1  
2  
3  
4  
5  
6  
7  
8  
9  
10  
11  
12  
13  
14  
15  
16  
17  
18  
19  
20  
21  
22  
23  
24  
25

## AIM2 inflammasome activation in astrocytes occurs during the late phase of EAE

William E. Barclay<sup>a</sup>, M. Elizabeth Deerhake<sup>a</sup>, Makoto Inoue<sup>a,b</sup>, Toshiaki Nonaka<sup>a</sup>, Kengo Nozaki<sup>a</sup>, Nathan A. Luzum<sup>a</sup>, Nupur Aggarwal<sup>a</sup>, Edward A. Miao<sup>a,c</sup>, Mari L. Shinohara<sup>a,c,\*</sup>

<sup>a</sup>Department of Immunology, Duke University Medical School. Durham, NC 27710.

<sup>b</sup>Department of Comparative Biosciences, University of Illinois at Urbana-Champaign, Urbana, IL 61802.

<sup>c</sup>Department of Molecular Genetics and Microbiology, Duke University Medical School. Durham, NC 27710.

**\*Corresponding Author:** Mari L. Shinohara  
mari.shinohara@duke.edu

**Keywords:** Experimental autoimmune encephalomyelitis (EAE); AIM2 inflammasome; astrocytes; ASC specks

## 26 **ABSTRACT**

27       Inflammasomes are a class of innate immune signaling platforms that activate in response  
28 to an array of cellular damage and pathogens. Inflammasomes promote inflammation under many  
29 circumstances to enhance immunity against pathogens and inflammatory responses through their  
30 effector cytokines, IL-1 $\beta$  and IL-18. Multiple sclerosis and its animal model, experimental  
31 autoimmune encephalomyelitis (EAE), are such autoimmune conditions influenced by  
32 inflammasomes. Despite work investigating inflammasomes during EAE, little remains known  
33 concerning the role of inflammasomes in the central nervous system (CNS) during the disease.  
34 Here we use multiple genetically modified mouse models to monitor activated inflammasomes *in*  
35 *situ* based on ASC oligomerization in the spinal cord. Using inflammasome reporter mice, we  
36 found heightened inflammasome activation in astrocytes after the disease peak. In contrast,  
37 microglia and CNS-infiltrated myeloid cells had few activated inflammasomes in the CNS during  
38 EAE. Astrocyte inflammasome activation was dependent on AIM2, but low IL-1 $\beta$  expression and  
39 no significant signs of cell death were found in astrocytes during EAE. Thus, the AIM2  
40 inflammasome activation in astrocytes may have a distinct role from traditional inflammasome-  
41 mediated inflammation.  
42

## 43 **SIGNIFICANCE STATEMENT**

44       Inflammasome activation in the peripheral immune system is pathogenic in multiple  
45 sclerosis (MS) and its animal model, experimental autoimmune encephalomyelitis (EAE).  
46 However, inflammasome activity in the central nervous system (CNS) is largely unexplored. Here,  
47 we used genetically modified mice to determine inflammasome activation in the CNS during EAE.  
48 Our data indicated heightened AIM2 inflammasome activation in astrocytes after the disease  
49 peak. Unexpectedly, neither CNS-infiltrated myeloid cells nor microglia were the primary cells with  
50 activated inflammasomes in SC during EAE. Despite AIM2 inflammasome activation, astrocytes  
51 did not undergo apparent cell death and produced little of the proinflammatory cytokine, IL-1 $\beta$ ,  
52 during EAE. This study showed that CNS inflammasome activation occurs during EAE without  
53 associating with IL-1 $\beta$ -mediated inflammation.  
54

## 55 **INTRODUCTION**

56       Multiple sclerosis (MS) and its mouse model, experimental autoimmune encephalomyelitis  
57 (EAE), are demyelinating neurodegenerative diseases punctuated by inflammatory immune  
58 reactions in the central nervous system (CNS). Inflammasomes are sensors of a wide range of  
59 microbe-associated molecular patterns (MAMPs) and damage-associated molecular patterns  
60 (DAMPs) and induce inflammation (1). In EAE, the NLRP3 inflammasome has a particularly well-  
61 documented role in the peripheral immune system in promoting immune cell recruitment to the  
62 CNS through the generation of the inflammatory cytokines IL-1 $\beta$  and IL-18 by peripheral myeloid  
63 cells (2-5). However, despite much work centered on inflammasomes in the peripheral immune  
64 response, the role of inflammasomes in the CNS is significantly less understood.

65       Inflammasomes are distinct from other PRRs in mode of signaling and downstream  
66 effector function. First, a sensor (*e.g.*, NLRP3, AIM2) forms a scaffold, to which the inflammasome  
67 adaptor ASC binds and polymerizes (called the “ASC speck”). Pro-caspase-1 associates with the  
68 polymer, then self-cleaves to become proteolytically active caspase-1, which further activates  
69 downstream substrates, including pro-IL-1 $\beta$ , pro-IL-18, and the pore-forming protein, gasdermin-  
70 D (GSDMD). Cleaved GSDMD forms a pore in cellular membranes and induces pyroptosis,  
71 resulting in a release of mature IL-1 $\beta$  and IL-18 to the extracellular space. In MS, genetic variation  
72 in inflammasome signaling pathways was reported (6, 7). Particularly, the NLRP3 inflammasome  
73 was demonstrated to be a prognostic factor and a therapeutic target in primary progressive MS  
74 (8). In EAE, NLRP3 and ASC are necessary for passive and standard (“Type-A”) active EAE (2-

75 4). NLRP3 inflammasome activation in macrophages and dendritic cells in secondary lymphoid  
76 organs results in IL-1 $\beta$  and IL-18 release, which induces expression of chemokines and their  
77 receptors required for leukocyte CNS entry (2). We have also demonstrated that the NLRP3  
78 inflammasome can be dispensable for EAE induction if the innate immune system is strongly  
79 activated with aggressive immunization schemes (“Type-B EAE”)(9).

80 As inflammasome activation is a post-translational process, the expression of  
81 inflammasome components does not necessarily indicate their activation. Thus, separately  
82 assessing both expression and activation of inflammasomes is critical. Recent studies indicated  
83 that microglia, astrocytes, and neurons can activate inflammasomes; and most identification was  
84 performed *ex vivo* (8, 10-17). However, defining inflammasome activation *in situ* is critical  
85 because CNS-resident cells significantly alter their behavior once isolated from tissues. So far,  
86 only a limited number of studies has demonstrated unequivocal activation of inflammasomes *in*  
87 *situ* in the CNS (10-12).

88 In this report, we identified activated inflammasomes in the CNS during EAE using the  
89 ASC-Citrine mouse line, which allows *in situ* detection of activated inflammasomes (18). Our study  
90 identified maximal inflammasome activation in the spinal cord (SC) after the EAE peak, which  
91 contrasts with the inguinal lymph nodes (iLNs), in which inflammasome activation was present at  
92 pre-symptomatic disease. Unexpectedly, neither microglia nor CNS-infiltrated myeloid cells were  
93 the primary cells with activated inflammasomes in SC during EAE. Instead, we detected  
94 inflammasome activation mainly in astrocytes and limited inflammasome activation in motor  
95 neurons. Furthermore, we found that the AIM2 inflammasome is activated in astrocytes during  
96 EAE. However, even with AIM2 inflammasome activation, astrocytes did not clearly undergo cell  
97 death and have poor *I11b* gene expression, suggesting the possibility that AIM2 inflammasome  
98 activation in astrocytes serves a different purpose than traditional inflammasome-mediated  
99 inflammation.

100

## 101 RESULTS

102

### 103 Inflammasome activation in the spinal cord at a late stage of EAE

104 Inflammasome signaling is critical to EAE development in the peripheral lymphoid organs  
105 (2-5, 9). Yet, the extent and spatiotemporal distribution of inflammasome activation in the CNS  
106 during EAE is largely unknown. Classically, detection of inflammasome activation is performed  
107 by identifying cleaved caspase-1 by Western blotting (WB), which cannot be applied *in situ*.  
108 Therefore, we used a different molecular signature of inflammasome activation – the  
109 oligomerization of ASC, microscopically observed as the “ASC speck.” In this study, we used  
110 inflammasome activation reporter mice, which express ASC fused to a fluorescent Citrine protein  
111 (ASC-Citrine)(18). The ASC-Citrine reporter allows *in situ* detection of active inflammasomes by  
112 visualization of ASC specks (12, 18) (**Fig. S1A**), and the presence of the reporter did not alter  
113 disease course of EAE (**Fig. 1A**). The ASC-Citrine reporter was validated for use in tissue by  
114 immunostaining against ASC in live spleen slice cultures following NLRP3 inflammasome  
115 activation (**Fig. S1A**).

116 Before evaluating inflammasome activation in the CNS, we first visualized and quantified  
117 ASC specks in the iLNs as the primary site of immune reaction to EAE induction. ASC specks  
118 were detected at 3 days post induction (dpi) of EAE (**Fig. 1B, C**), which is well before the disease  
119 onset, and continually detected until 9-dpi (**Fig. 1C**). However, ASC specks were almost  
120 undetectable by the point of disease peak (16-dpi) and after (**Fig. 1C**). The cervical lymph nodes  
121 (cLN) have also been noted as a site of primary immune reaction in some models of EAE (19,  
122 20), but few ASC specks were detected there throughout disease (**Fig. S1B**). The spinal cord  
123 (SC) of ASC-Citrine mice exhibited a much higher number of ASC specks than the iLNs (**Fig. 1D-**

124 **F)** with a significant increase in the number of ASC specks in the later phase of EAE at 30-dpi  
125 (**Fig. 1D, F**). Further, in addition to ASC specks, we also observed atypical fiber-like ASC-Citrine  
126 signals, which we termed “ASC strings,” unique to the CNS (**Fig. 1G**). While different in  
127 magnitude, both ASC specks and ASC strings appeared with the largest increases at the later  
128 phase of disease, around 30-dpi (**Fig. 1F, H**). Due to the abundance of ASC specks and strings  
129 at 30-dpi, all subsequent analyses in SC were at 30-dpi, unless otherwise stated. This  
130 quantification was also performed manually, and all subsequent ASC speck and string  
131 quantification was performed using the Imaris software.

132 We have previously shown a sub-type of EAE (Type-B EAE) which does not require the  
133 NLRP3 inflammasome in the peripheral lymphoid organs to develop EAE (9). In the CNS, Type-  
134 A and Type-B EAE had comparable numbers of ASC specks (**Fig. S1C, D**), suggesting the more  
135 consistent connection of EAE severity and active inflammasome in the CNS than in the periphery.  
136 In sum, these results suggest that inflammasomes are activated in the SC during both Type-A  
137 and Type-B EAE and that their activation is heightened after peak disease.

138

### 139 **Inflammasome activation in non-BM-derived cells in the spinal cord**

140 Because we identified inflammasome activation in the CNS during EAE, the role of ASC  
141 in non-hematopoietic cells was investigated with a bone marrow (BM) chimera approach using  
142 CD45.1 congenic donor mice. We compared two groups of BM chimeras, generated by adoptively  
143 transferring WT BM cells to either WT or *Pycard*<sup>-/-</sup> (ASC knockout) recipients (the extent of  
144 reconstitution is shown in **Fig. S2A**). Compared to WT recipients, *Pycard*<sup>-/-</sup> recipients  
145 demonstrated milder EAE after the disease peak (**Fig. 2A-C**), suggesting that ASC in non-  
146 hematopoietic cells impacted EAE severity after the disease peak. Next, we sought to determine  
147 if CNS-infiltrated cells possess activated inflammasomes in the SC during EAE. Two groups of  
148 BM chimeras were compared; one group with ASC-Citrine BM donor cells to wild-type (WT)  
149 recipients and the other with WT BM cells to ASC-Citrine recipients. Reconstitution of  
150 approximately 90% of BM cells were confirmed (**Fig. S2B**) and no impact of ASC-Citrine  
151 expression on EAE development was confirmed (**Fig. S2C**). ASC specks were identified in the  
152 iLNs of WT recipients reconstituted with ASC-Citrine BM (**Fig. 2D, E**). However, unexpectedly,  
153 the mice showed no ASC specks and strings in the SC (**Fig. 2F-H; S2D**). In contrast, ASC specks  
154 and strings were identified in the SC of ASC-Citrine recipients transferred with WT BM cells (**Fig.**  
155 **2F-H**). This suggests that the source of inflammasome activation is CNS-resident cells in the SC.

156

### 157 **Inflammasome activation in CNS during EAE in astrocytes**

158 We next sought to identify CNS-resident cells with activated inflammasomes during EAE.  
159 ASC specks and strings were identified, and then cell types were assigned by counterstaining to  
160 identify microglia (TMEM119), astrocytes (GFAP or ALDH1L1), neurons (NeuN), oligodendrocyte  
161 precursor cells (NG2), or mature oligodendrocytes (MBP) (**Fig. 3A-C; S2E, F**). The majority of  
162 ASC specks and strings were found in astrocytes, while a small number were classified as  
163 microglial and neuronal (**Fig. 3D-F**). Few ASC specks or strings were detected in oligodendrocyte  
164 precursor cells (OPCs) or mature oligodendrocytes (**Fig. S2G, H**). In neurons, all ASC specks  
165 were found in cell bodies of ChAT<sup>+</sup> alpha motor neurons (ChAT<sup>+</sup>NeuN<sup>+</sup>) in the ventral horn (VH),  
166 but these neuronal ASC specks did not increase during EAE (**Fig. S2I**).

167 We further validated these findings with a cell type-specific ASC-Citrine reporter approach  
168 by using *Asc-Citrine*<sup>LSL</sup> mice, which retain an LSL cassette upstream of the ASC-Citrine construct.  
169 To express ASC-Citrine in astrocytes and neurons in a cell type-specific manner, we used  
170 *Gfap*<sup>Cre</sup>;*Asc-Citrine*<sup>LSL</sup> and *Syn1*<sup>Cre</sup>;*Asc-Citrine*<sup>LSL</sup> mice, respectively. For microglia-specific ASC-  
171 Citrine expression, we used *Cx3cr1*<sup>CreERT2</sup>;*Asc-Citrine*<sup>LSL</sup> mice treated with tamoxifen (TAM) with  
172 a six-week “wash out” period to exclude ASC-citrine expression in myeloid cells other than  
173 microglia (**Fig. S3A**) by taking an advantage of the long half-life of microglia (gating strategy to

174 evaluate microglia is shown in **Fig. S3B**). We considered that using the microglia-specific ASC-  
175 Citrine reporter mice was critical because the expression level of Tmem119, used in **Fig. 3A-F**,  
176 decreases as EAE progresses (21) and may confound some image analysis. No alteration in EAE  
177 severity was confirmed in the group of mutant mice expressing Cre in targeted cell types (**Fig.**  
178 **S3C-E**). The SC of these mutant mice was analyzed during EAE by confocal microscopy (**Fig.**  
179 **4A-C**). Again, a high number of ASC specks and strings were confirmed in astrocytes by using  
180 the *Gfap<sup>Cre</sup>;Asc-Citrine<sup>LSL</sup>* mice, while few ASC specks or strings were identified in microglia (**Fig.**  
181 **4D, E**). Neurons also showed a consistent but small number of ASC specks (**Fig. 4D, E**).  
182 Nonetheless, these data mirrored the results by antibody counterstaining in **Fig. 3A-G**, strongly  
183 indicating that inflammasome activation is predominantly in astrocytes during EAE.  
184

### 185 **Limited induction of IL-1 $\beta$ -mediated inflammation by astrocytes during EAE**

186 In EAE, astrocytes become activated in a process called astrogliosis; these activated cells  
187 gain a pro-inflammatory phenotype and are termed “reactive astrocytes” (22, 23). Here we  
188 investigated whether astrogliosis correlates with inflammasome activation. Astrogliosis was  
189 detected as increased GFAP intensity at 30-dpi (**Fig. 5A, B**), but GFAP intensity did not correlate  
190 on a per cell basis with the presence of ASC specks (**Fig. 5C, D**). We similarly found no correlation  
191 between inflammasome activation and individual acquisition of the neurotoxic “A1” reactive  
192 astrocyte phenotype (24, 25), based on the A1-astrocyte marker C3d (26), although C3d  
193 expression was enhanced in astrocytes in aggregate during EAE (**Fig. 5C, E**).

194 To evaluate astrocyte gene expression during EAE, we first re-analyzed publicly available  
195 data obtained with a *Gfap<sup>Cre</sup>*-driven RiboTag mouse system, which allows purification of astrocyte-  
196 specific RNA (GSE100329)(27). Gene expression in total SC and SC astrocytes were compared  
197 between naïve and 30-dpi EAE mice. We found low expression of *Il1b* and genes encoding  
198 inflammasome sensor proteins (**Fig. S4A**). Expression levels of *Il18* and *Casp1* were enriched in  
199 astrocytes independent of EAE (**Fig. S4A**). To validate this data, we evaluated gene expression  
200 by RT-qPCR in total SC cells and astrocytes enriched by bead selection from naïve and 30-dpi  
201 EAE mice. Astrocyte-enriched cells showed generally low expression of genes encoding proteins  
202 related to inflammasomes even during EAE. Notably, the expression of *Il1b*, *Casp-1*, and *Gsdmd*  
203 was significantly lower in astrocyte-enriched cells than total SC cells (normalized to *Il1b* and  
204 *Casp1* expression in naïve total SC cells for **Fig. 6A** and **B**, respectively). In the qPCR analyses,  
205 a majority of genes shown in **Fig. S4A** had mRNA levels that were close to the detection limit,  
206 despite reasonably high total RNA amounts, suggesting the general low expression of  
207 inflammasome-related genes in astrocytes. Under the low gene expression, we did not observe  
208 astrocyte enrichment of *Il18* and *Casp1* expression, as suggested in the RiboTag data (**Fig. S4A**).  
209 This was consistent with the limited detection of the inflammasome-related proteins caspase-1,  
210 IL-1 $\beta$ , and GSDMD in SC astrocytes of either naïve mice or mice with EAE 30 dpi by  
211 immunostaining, despite robust detection in the spleen (**Fig. S4B-G**). However, mild expression  
212 of GSDMD was detected in SC astrocytes following EAE induction (**Fig. S4D, G**). Next, we  
213 performed Western blotting (WB) to evaluate protein levels and inflammasome activation *in vitro*.  
214 Here, we used the C8-S astrocyte cell line due to the difficulty of culturing primary astrocytes,  
215 especially without altering their character in tissue culture settings. We compared C8-S to bone  
216 marrow-derived macrophages (BMDMs) as a positive control. We stimulated the NLRP3 or AIM2  
217 inflammasome with nigericin or poly(dA:dT)-liposomes, respectively, after ultrapure LPS pre-  
218 treatment. Culture supernatants of C8-S showed a scarcity of cleaved caspase-1, IL-1 $\beta$  and IL-  
219 18 (**Fig. 6C; S5A-C**). Notably, C8-S cell lysates also showed greatly reduced pro-caspase-1, pro-  
220 IL-1 $\beta$ , GSDMD-FL, and GSDMD-NT, compared to BMDMs (**Fig. 6C; S5D-H**). These results  
221 suggest that astrocytes do not induce inflammation, mediated particularly by IL-1 $\beta$  as  
222 macrophages do.

223 Next, we investigated whether astrocytes with ASC specks or strings undergo cell death  
224 during EAE. We attempted to assess general cell death by TUNEL staining. TUNEL<sup>+</sup> cells were  
225 present in the periphery of the SC at 30-dpi EAE, though no TUNEL<sup>+</sup> astrocytes were detected  
226 (Fig. 6D, E), consistent with previous data demonstrating that astrocytes do not undergo  
227 significant cell death during EAE (28). Although normally not associated with canonical  
228 inflammasomes, we found enriched active caspase-3 (CC3) in astrocytes with active  
229 inflammasomes in both ASC-Citrine (Fig. 6F, G) and *Gfap*<sup>Cre</sup>;*Asc-Citrine*<sup>LSL</sup> (Fig. S5I) mice,  
230 suggesting a possible connection between inflammasomes and caspase-3 activation in  
231 astrocytes. In summary, inflammasomes activation in astrocytes does not appear to lead to typical  
232 outcomes of inflammasome activation as seen in myeloid cells.  
233

### 234 AIM2 facilitates inflammasome activation in the CNS during EAE

235 To further assess which inflammasome is activated in astrocytes during EAE, we selected  
236 NLRP3 and AIM2 among the inflammasome sensors based on their expression by astrocytes  
237 during EAE by the Ribotag raw transcript data (Fig. S4A). As *Nlrp3*<sup>-/-</sup> mice are resistant to  
238 standard EAE, we used the Type-B EAE model to induce EAE in the *Nlrp3*<sup>-/-</sup> background (3, 9)  
239 and confirmed that ASC-Citrine mice and *Nlrp3*<sup>-/-</sup>;*ASC-Citrine* developed similar disease course  
240 and severity, as expected (Fig. S6A). Here, *Nlrp3*<sup>-/-</sup>;*ASC-Citrine* mice still showed comparable  
241 numbers of ASC specks with *ASC-Citrine* mice (Fig. 7A, B), suggesting that NLRP3 is  
242 dispensable in CNS inflammasome activation during EAE. Next, we tested the AIM2  
243 inflammasome. Congruent with recent reports (13, 29), we found AIM2 to be protective in EAE,  
244 as demonstrated by more severe disease in *Aim2*<sup>-/-</sup> mice predominantly after disease peak, when  
245 induced with a low dose adjuvant (50 µg *Mtb*/mouse) (Fig. 7C, D). The immune phenotype of  
246 *Aim2*<sup>-/-</sup> mice in SC, iLN, and spleen at 16-dpi did not show statistically significant changes  
247 compared to WT mice, although a trend of increased T cells, microglia, and macrophages were  
248 observed, possibly reflecting the disease severity of *Aim2*<sup>-/-</sup> mice (Fig. S6B-D), together with  
249 enhanced astrogliosis (Fig. S6E, 7E).

250 Next, we investigated the role of the AIM2 in astrocyte inflammasome activation during  
251 EAE. To do so, we sought an EAE condition for *Aim2*<sup>-/-</sup> mice to develop comparable EAE severity.  
252 Despite increased EAE severity in *Aim2*<sup>-/-</sup> mice, an increased adjuvant dose (200 µg *Mtb*/mouse)  
253 elicited comparable EAE scores between WT and *Aim2*<sup>-/-</sup> mice (Fig. 7F). Here, a strong gene  
254 dosage effect of AIM2 on ASC speck formation was observed (Fig. 7G, H), strongly suggesting  
255 that inflammasome activation in astrocytes *in vivo* indeed requires AIM2.  
256

257

## 258 DISCUSSION

259 Many studies show gene and protein expression of inflammasome components in the  
260 CNS *in vivo*, but a few have evaluated *bona fide* inflammasome activation. This study used  
261 reporter mice to detect activated inflammasomes *in situ* in a cell-type-specific manner in the CNS  
262 during EAE. Using the ASC-Citrine mice, we identified AIM2 inflammasome activation after  
263 disease peak mainly in astrocytes in the SC of EAE mice. Unexpectedly, we detected limited or  
264 no inflammasome activation in CNS-infiltrated myeloid cells or microglia.

265 Previous studies suggested inflammasome activation in CNS-resident cells during EAE  
266 and MS, but these studies evaluated inflammasome activation of microglia or astrocytes in tissue  
267 culture (8, 13-17). A few studies demonstrated inflammasome activation in the CNS during EAE  
268 *in situ*. One such study showed ASC specks in Iba-1<sup>+</sup> cells, suggested to be microglia, in the  
269 hippocampus of EAE mice, but the investigation was not extended to astrocytes (11). Another  
270 study suggested caspase-8-mediated noncanonical NLRP3 inflammasome activation in microglia  
271 in the SC of EAE mice based on caspase-8-FLICA staining of tissue sections (30). It is possible

272 that a small number of microglia may activate inflammasomes, although our data showed that  
273 significantly more inflammasome activation occurs at 30-dpi in astrocytes.

274 We and other groups have shown that the NLRP3 inflammasome is detrimental in EAE.  
275 However, recent studies (13, 29) and our results demonstrate that AIM2 can play a protective  
276 role. Chou et al. demonstrated that AIM2 suppresses EAE by promoting T<sub>reg</sub> stability in an  
277 inflammasome-independent fashion (29). Similarly, the study by Ma et al. demonstrated a  
278 protective role of AIM2 through another inflammasome-independent mechanism targeting the  
279 DNA-PK-AKT3 pathway (13). Using *Aim2<sup>fl/fl</sup>;Gfap<sup>Cre</sup>* mice, Ma et al. evaluated the disease severity  
280 in Type-B EAE and found that astrocyte-specific *Aim2* depletion did not change the disease  
281 severity (13). Of note, the study did not evaluate the disease score beyond 18 dpi (around disease  
282 peak) (13). However, our data indicated numbers of ASC specks both in naïve and 16-dpi EAE  
283 mice (around disease peak) are basal, while the most significant increase was observed on 30-  
284 dpi. Additionally, Ma et al. induced Type-B EAE in *Aim2<sup>fl/fl</sup>;Gfap<sup>Cre</sup>* mice (13) but we did not. Thus,  
285 intensity of EAE induction possibly affects the involvement of AIM2 in EAE too, as we  
286 demonstrated that increased adjuvant upon induction of EAE blunts the impact of AIM2 on  
287 disease (**Fig. 7F**). A long-term evaluation of astrocyte-specific AIM2 knockout mice and  
288 elucidating an impact of EAE induction methods will merit further understanding the protective  
289 role of the AIM2 inflammasomes in astrocytes.

290 Using the ASC-Citrine mouse model, two recent reports have identified ASC specks in the  
291 cerebellum during development (12) and in retinal astrocytes during ocular hypertension injury  
292 (31). Notably, one of the studies also showed the ASC specks in naïve animals (12), mirroring  
293 our finding of ASC specks in naïve SC (**Fig. 1D, F**). Further, the ASC specks in the study are  
294 AIM2-dependent, and the AIM2 inflammasome contributes to normal brain development (12).  
295 Therefore, the function of the AIM2 inflammasome in the CNS may be intrinsically different from  
296 that in peripheral myeloid cells, which are equipped to induce inflammation. For example, our  
297 study indicated that astrocytes express little *I11b* mRNA and exhibit no marked cell death upon  
298 inflammasome activation in EAE, suggesting that inflammasome activation in astrocytes *in vivo*  
299 may have biological implications other than enhancing inflammation.

300 In this study, we observed ASC strings, which were unique to the CNS *in vivo*. However,  
301 some *ex vivo* studies have shown a similar ASC string-like structure. “ASC filaments” have been  
302 documented *ex vivo* with mutant ASC (32) or with ASC CARD domain blockade or deletion (33-  
303 35). An ASC isoform (ASC-c) also generates ASC filaments in human cells and appears to be  
304 expressed in mice, at least in the J774A.1 cell line (36). It is not known how astrocytes generate  
305 ASC strings, but several possibilities exist, such as potential astrocyte-specific expression of the  
306 ASC-c isoform or interaction of inflammasome components with astrocyte-specific molecules. For  
307 example, GFAP and vimentin bind together as part of the astrocyte intermediate filament network  
308 (37); and vimentin is known to interact with inflammasome components, such as caspase-1 (38).  
309 Thus, a possible physical association of GFAP to inflammasome components might explain the  
310 appearance of ASC strings in the highly ramified astrocyte.

311 We identified activated caspase-3 in astrocytes with ASC specks in the absence of cell  
312 death. Caspases, including caspase-3, possess critical functions outside of induction of cell death  
313 (39). Specifically, non-apoptotic caspase-3 activation is involved in the differentiation of numerous  
314 cell types, such as monocytes, neurons, and hematopoietic stem cells (39). Also, neurons, which  
315 derive from similar progenitors to astrocytes, rely on caspase-3 for dendrite and axon remodeling  
316 (40, 41) and synaptic plasticity (42). Caspase-3 activation in astrocytes is also associated with  
317 astrogliosis and not cell death (43-46). Specifically, caspase-3 activation in astrocytes is  
318 associated with cytoskeletal remodeling in a kainic-acid induced neurodegeneration model (44),  
319 reactive astrocytes following excitotoxic N-Methyl-D-aspartate (NMDA)-induced  
320 neurodegeneration (46), and GFAP cleavage in an Alzheimer’s disease model (43). Indeed, our  
321 data suggested the involvement of AIM2 inflammasome in caspase-3 activation and GFAP  
322 cleavage. The non-apoptotic activation of caspase-3 in astrocytes is inducible *in vitro*, and

323 promotes expression of glutamate synthase and basic fibroblast growth factor-mediated by  
324 astrogliosis (45). Our study now connects inflammasome activation in astrocytes to caspase-3  
325 activation and so warrants further study into the role of caspase-3 in astrogliosis.

326 The AIM2 inflammasome is activated by double-stranded DNA (dsDNA) derived not only  
327 from microbes but also from endogenous sources as a sentinel of genotoxic stress and DNA  
328 damage. The AIM2 inflammasome protects from gastrointestinal toxicity and hematopoietic failure  
329 in total-body irradiation (47), which triggers DNA double-strand breaks (47) and nuclear  
330 membrane disruption (48). Indeed, the detection of dsDNA by AIM2 is required for normal  
331 neurodevelopment during periods of proliferative stress in neurons of the CNS (12). These studies  
332 demonstrated AIM2-mediated protection from damage and even limiting inflammation, which  
333 positions the AIM2 inflammasome separately from the classical understanding of other  
334 inflammasomes, such as the NLRP3 inflammasome. Opposing outcomes of EAE severity in the  
335 absence of AIM2 versus ASC, as well as our results demonstrating a detrimental role of ASC in  
336 non-hematopoietic cells (**Fig. 2A-C**), are intriguing; however perhaps not surprising, as ASC is  
337 the common adaptor to other inflammasomes, including the NLRP3 inflammasome, which is  
338 pathogenic during EAE. Thus, the pathogenic impact of the NLRP3 inflammasome (and perhaps  
339 the Pyrin inflammasome (49)) on EAE potentially supersedes the functions of the AIM2  
340 inflammasome in an ASC-deficient animal.

341 In conclusion, our study demonstrates astrocyte AIM2 inflammasome activation without  
342 eliciting IL-1 $\beta$ -mediated inflammation in the late phase of EAE. This study expands our  
343 understanding of astrocytes in EAE and warrants further investigation of non-inflammatory  
344 functions of the AIM2 inflammasome in astrocytes during neuroinflammation.

345

346

## 347 MATERIALS AND METHODS

348

349 **Animals.** We used mice of the C57BL/6 genetic background of both sexes aged 8-12 weeks old,  
350 unless otherwise noted. Because we did not identify sex differences in our experiments, both  
351 male and female were equally represented in our experiments. The ASC-Citrine mice were  
352 generated and gifted by Dr. Douglas Golenbock (University of Massachusetts Medical School).  
353 The *Pycard*<sup>-/-</sup> and *Nlrp3*<sup>-/-</sup> mice were initially obtained from Genentech. The following mice are  
354 from The Jackson Laboratory; *Cx3cr1*<sup>CreERT2</sup> (#020940) *Gfap*<sup>Cre</sup> (#012886), *Asc-Citrine*<sup>LSL</sup>  
355 (#030743), *Syn1*<sup>Cre</sup> (#003966), and *Aim2*<sup>-/-</sup> (# 013144). *Gfap*<sup>Cre</sup> and *Syn1*<sup>Cre</sup> mice were used as  
356 heterozygotes. Mice for all experiments were housed in a specific pathogen-free environment. All  
357 animal experiments included in this study were approved by the Institutional Animal Care and Use  
358 Committee of Duke University.

359

360 **EAE induction and scoring.** Mice were immunized with CFA/MOG emulsion in the lower back  
361 on day 0. The emulsion was prepared by mixing MOG<sub>35-55</sub> peptide (United Biosystems, Cat#  
362 U104628) and complete Freund's adjuvant (Sigma-Aldrich, Cat# F5881) with additional *Mtb* (BD  
363 Difco, Cat# 231141; 200  $\mu$ g/mouse). The mice also received an intraperitoneal injection of  
364 Pertussis toxin (PTx) (200ng/mouse) (List Biological Technologies, Cat# 180) on Day 0 and 2.  
365 Unless otherwise noted, we induced EAE with this method, as "Type-A EAE" (100  $\mu$ g MOG<sub>35-  
366 55</sub>/mouse and 200  $\mu$ g *Mtb*/mouse)(9). In some experiments, "Type-B EAE" (9) was induced with  
367 CFA/MOG injection on day 0 and 7 (100  $\mu$ g MOG<sub>35-55</sub>/mouse, 400  $\mu$ g *Mtb*/mouse) and PTx (200  
368 ng/mouse) on day 0, 2, and 7. EAE was scored as previously described (2, 3, 9).

369

370 **Preparation of frozen tissue sections and staining with antibodies.** Animals were lethally  
371 anesthetized with 100 mg/kg of Nembutal administered intraperitoneally and transcidentally  
372 perfused with PBS and subsequently 4% paraformaldehyde (PFA)(Sigma-Aldrich, Cat# 158127).  
373 SC and iLNs were harvested and fixed for 24 hours at 4°C in 4% PFA. All tissues were



374 cryoprotected in 30% sucrose in water for an additional 24 hours before embedding and freezing  
375 in Tissue-Tek O.C.T. compound (Sakura, Cat# 4583) on dry ice. Tissues were sectioned using a  
376 Cryostar NX50 (Thermo Fisher Scientific) at a thickness of 25  $\mu\text{m}$  and rendered as floating  
377 sections. Sections were permeabilized with 0.25 % Triton X100 (Amresco, Cat# 0694-1L) and  
378 blocked using 2% bovine serum albumin (GeminiBio / Cat# 700-101P). After antibody staining,  
379 sections were mounted onto slides with ProLong™ Gold Antifade Mountant (Invitrogen, Cat#  
380 P36931) or ProLong™ Gold Antifade Mountant with DAPI (Invitrogen, Cat# P36930). TUNEL  
381 staining was also performed with 25  $\mu\text{m}$  thick floating tissue sections with the CF 640R TUNEL  
382 Assay Apoptosis Detection Kit (Biotium, Cat# 30074). Antibodies used for staining are indicated  
383 in **Supplementary Table 1**.  
384

385 **Preparation of tissue slice culture and anti-ASC immunostaining.** Spleens were dissected  
386 out of mice, and live spleen slices were prepared with a vibratome (Precisionary Compresstome)  
387 using 4% low melt agarose as described by manufacturer's protocol. Slices in complete RPMI  
388 were kept as floating sections and treated with 100 ng/mL Ultrapure LPS (Invivogen, Cat# tlr1-  
389 3pelps) for 2 hours followed by 5  $\mu\text{M}$  nigericin (Sigma-Aldrich, Cat# N7143) for additional 1 hour.  
390 After fixation and permeabilization with ice cold methanol for 15 minutes, slices were blocked with  
391 2% BSA in PBS for 1 hour at RT. Immunofluorescence staining was performed with antibodies  
392 listed in **Table S1**.  
393

394 **Immunofluorescence microscopy and image analyses.** All slides were imaged on the Zeiss  
395 710 Inverted Laser Scanning Confocal Microscope (Duke University Light Microscopy Core  
396 Facility) at full 25  $\mu\text{m}$  depth as z-stacks. For quantifications, 2 sections per animal were imaged,  
397 and a 2x2 grid tile scan was performed using the 20x objective centered on the ventral horn of  
398 the SC, totaling 8 fields per mouse. Following quantification, these replicates were averaged to  
399 generate a single  $n$  for statistical analyses. Semi-automated quantification was conducted using  
400 the Imaris for Neuroscientists Cell Imaging Software ver. 9.3.0. (Bitplane) unless otherwise  
401 indicated. Briefly, the Surfaces tool was used to identify either ASC specks/strings or cells, and  
402 intensity thresholds of counterstain signals within the surfaces were used to quantify the desired  
403 characteristics. ASC specks and ASC strings counts in **Fig. 1** were manually enumerated using  
404 the LSM Browser software (Zeiss).  
405

406 **Bone Marrow Chimeras.** Recipient mice (CD45.2; 6-8 weeks old) were lethally irradiated with  
407 900 rad (XRAD 320 X-Ray irradiator) and adoptively transferred with  $10^6$  CD45.1 donor bone  
408 marrow (BM) cells. Mice were supported with water containing sulfamethoxazole and  
409 trimethoprim for 1 week following irradiation. At 6 weeks post-adoptive transfer, the donor cell  
410 reconstitution was confirmed by differential expression of congenic markers in peripheral blood  
411 using the BD FACSCanto II (BD Biosciences).  
412

413 **Tamoxifen pulse for selective microglial labeling.** This procedure was adapted from previous  
414 work (50). Briefly, mice with *Cx3cr1<sup>CreERT2</sup>* (6-8 weeks old) received an intraperitoneal injection of  
415 75 mg/kg tamoxifen dissolved in corn oil. The second injection with the same formula was  
416 administered two days later. Mice were kept for six weeks after the last tamoxifen administration  
417 for six weeks before EAE induction.  
418

419 **Astrocyte isolation and RT-qPCR.** Astrocytes were isolated as previously described (51) with a  
420 few modifications. Briefly, mouse SC were minced into  $\sim 1\text{mm}^2$  pieces and digested using the  
421 Papain Dissociation System (Worthington Biochemical Corporation, Cat# LK003153). Isolated  
422 cells were negatively selected tandemly first with Myelin Removal Beads II (Miltenyi Biotec, Cat#  
423 130-096-731) and second with anti-CD11b MicroBeads (Miltenyi Biotec, Cat# 130-049-601) to  
424 collect the flowthrough fraction. To enrich astrocytes, the flowthrough cells were first treated with

425 FcBlock (Miltenyi Biotec, Cat# 130-092-575), then positively selected using anti-ACSA-2  
426 MicroBeads (Miltenyi Biotec, Cat# 130-097-678). Total RNA was prepared using TRI Reagent  
427 (Millipore-Sigma, Cat# 93289) and reverse-transcribed using qScript cDNA Mix (Quantabio, Cat#  
428 950048) to obtain cDNA. RT-qPCR assays were performed with SYBR FAST qPCR Master Mix  
429 (Kapa Biosystems, Cat# KK4602), using primers indicated in **Supplementary Table 2**.  
430 Expression levels of target genes relative to an internal control, *Actb*, were calculated using the –  
431  $\Delta\Delta C_t$  method (52).

432  
433 **Cell culture and Western blotting analysis.** BMDMs were generated by culturing total BM cells  
434 for 7 days in complete RPMI supplemented with 10 ng/mL recombinant mouse M-CSF  
435 (BioLegend, Cat# 576406M-CSF). C8-S cells (ATCC, Cat# CRL-2535) were cultured in complete  
436 DMEM. One day before stimulation, BMDMs and C8-S cells were seeded into poly-L-lysine-  
437 coated 12-well plates ( $1.5 \times 10^6$  cells/well). Then, cells were pre-treated with 100 ng/mL Ultrapure  
438 LPS (Invivogen, Cat# tlr-3pelps) in serum-free Opti-MEM medium (Thermo Fisher Scientific, Cat#  
439 11058021) for 2 hours and stimulated with 5  $\mu$ M nigericin (Sigma-Aldrich, Cat# N7143) or  
440 poly(dA:dT) (InvivoGen, Cat# tlr-patn) for 4 hours to activate the NLRP3 and AIM2  
441 inflammasomes, respectively. Poly(dA:dT) was used as a complex with Lipofectamine 2000  
442 (InvitroGen, Cat# 11668019) at a concentration of 0.5  $\mu$ g/mL. Culture supernatants and cell  
443 lysates (in RIPA buffer) were harvested and, total protein concentrations were quantified using  
444 the BCA Protein Assay Kit (ThermoFisher Scientific, Cat# 23227). The same amount of total  
445 protein was used across all samples for SDS-PAGE gel separation. Western blotting (WB) was  
446 performed with indicated antibodies (**Supplementary Table 1**), and the result was imaged using  
447 the GeneGnome Chemiluminescence System (Syngene) and the Genesys (Syngene) software.  
448 Band intensity was quantified using the Genetools (Syngene) Software. Lysate  $\beta$ -actin band  
449 intensity was used to normalize both the lysate and supernatant band intensity.

#### 450 451 **Statistical Analyses**

452 Area under the curve (AUC) values were used to statistically analyze EAE scoring data. The  
453 Mann-Whitney U-test was used to compare between two groups, unless otherwise indicated. Pre-  
454 peak and post-peak AUC were defined by identifying the dpi at which disease score ceased to  
455 increase or began to decrease for both groups in a single experiment. All other analyses, where  
456 indicated in the figure legend, were performed using either the Mann-Whitney U-test, a One-  
457 Factor ANOVA, or a Two-Factor ANOVA. Post-hoc testing was performed only if ANOVA reached  
458 significance on interaction term ( $p < 0.1$ ). The Dunnett's Multiple Comparisons and the Sidak's  
459 multiple comparisons were conducted post-hoc where indicated in the figure legend. All statistical  
460 analyses were performed using the Graphpad Prism 8 software.

461  
462  
463 **Author Contributions:** W.E.B., M.E.D., and M.L.S. designed research; W.E.B., M.E.D., M.I.,  
464 T.N., K.N., N.A.L., and N.A. performed experiments, W.E.B. M.E.D., and M.L.S. analyzed data;  
465 W.E.B. and M.L.S wrote the manuscript; and M.E.D., M.I., K.N., N.A.L., N.A. and E.A.M. edited  
466 the manuscript.

467  
468 **Competing Interest Statement:** The authors declare no competing interest.

469  
470 **Data Availability:** All study data are included in the article and/or *SI Appendix*.

471  
472 **Acknowledgements:** We appreciate Dr. Golenbock for his generous gift of a mutant mouse  
473 strain and for sharing unpublished data. We also appreciate Dr. Cagla Eroglu and Maria Pia  
474 Rodriguez Salazar for their advice on handling astrocytes. We appreciate Dr. Ryan Finethy for  
475 his advice on inflammasome immunostaining protocols. We also appreciate Tomoko Kadota and

476 Amesha Crudup for their help in mouse maintenance. This study was funded to M.L.S. by National  
477 Multiple Sclerosis Society (NMSS) Research Grant (RG 4536B2/1), NIH (R01-NS120417, R01-  
478 AI088100), and the Chancellor's Discovery Program Research Fund at Duke University School  
479 of Medicine.

480

#### 481 **Footnotes:**

482 [✉](#)<sup>1</sup>To whom correspondence may be addressed. Email: mari.shinohara@duke.edu

#### 483 **AIM2**

484

485

486

#### 487 **REFERENCES**

488

- 489 1. P. Broz, V. M. Dixit, Inflammasomes: mechanism of assembly, regulation and signalling. *Nat Rev*  
490 *Immunol* **16**, 407-420 (2016).
- 491 2. M. Inoue, K. L. Williams, M. D. Gunn, M. L. Shinohara, NLRP3 inflammasome induces  
492 chemotactic immune cell migration to the CNS in experimental autoimmune encephalomyelitis.  
493 *Proc Natl Acad Sci U S A* **109**, 10480-10485 (2012).
- 494 3. M. Inoue *et al.*, Interferon-beta therapy against EAE is effective only when development of the  
495 disease depends on the NLRP3 inflammasome. *Sci Signal* **5**, ra38 (2012).
- 496 4. D. Gris *et al.*, NLRP3 plays a critical role in the development of experimental autoimmune  
497 encephalomyelitis by mediating Th1 and Th17 responses. *J Immunol* **185**, 974-981 (2010).
- 498 5. W. Barclay, M. L. Shinohara, Inflammasome activation in multiple sclerosis and experimental  
499 autoimmune encephalomyelitis (EAE). *Brain Pathol* **27**, 213-219 (2017).
- 500 6. L. Vidmar *et al.*, Multiple Sclerosis patients carry an increased burden of exceedingly rare genetic  
501 variants in the inflammasome regulatory genes. *Sci Rep* **9**, 9171 (2019).
- 502 7. S. Malhotra *et al.*, NLRP3 polymorphisms and response to interferon-beta in multiple sclerosis  
503 patients. *Mult Scler* **24**, 1507-1510 (2018).
- 504 8. S. Malhotra *et al.*, NLRP3 inflammasome as prognostic factor and therapeutic target in primary  
505 progressive multiple sclerosis patients. *Brain* 10.1093/brain/awaa084 (2020).
- 506 9. M. Inoue *et al.*, An interferon-beta-resistant and NLRP3 inflammasome-independent subtype of  
507 EAE with neuronal damage. *Nat Neurosci* **19**, 1599-1609 (2016).
- 508 10. M. T. Heneka *et al.*, NLRP3 is activated in Alzheimer's disease and contributes to pathology in  
509 APP/PS1 mice. *Nature* **493**, 674-678 (2013).
- 510 11. B. Hou *et al.*, Inhibition of the NLRP3-inflammasome prevents cognitive deficits in experimental  
511 autoimmune encephalomyelitis mice via the alteration of astrocyte phenotype. *Cell Death Dis* **11**,  
512 377 (2020).
- 513 12. C. R. Lammert *et al.*, AIM2 inflammasome surveillance of DNA damage shapes  
514 neurodevelopment. *Nature* **580**, 647-652 (2020).
- 515 13. C. Ma *et al.*, AIM2 controls microglial inflammation to prevent experimental autoimmune  
516 encephalomyelitis. *J Exp Med* **218** (2021).
- 517 14. B. A. McKenzie *et al.*, Activation of the executioner caspases-3 and -7 promotes microglial  
518 pyroptosis in models of multiple sclerosis. *J Neuroinflammation* **17**, 253 (2020).
- 519 15. B. A. McKenzie *et al.*, Caspase-1 inhibition prevents glial inflammasome activation and pyroptosis  
520 in models of multiple sclerosis. *Proc Natl Acad Sci U S A* **115**, E6065-E6074 (2018).

- 521 16. T. Zeis *et al.*, Metabolic gene expression changes in astrocytes in Multiple Sclerosis cerebral  
522 cortex are indicative of immune-mediated signaling. *Brain Behav Immun* **48**, 313-325 (2015).
- 523 17. L. Freeman *et al.*, NLR members NLRC4 and NLRP3 mediate sterile inflammasome activation in  
524 microglia and astrocytes. *J Exp Med* **214**, 1351-1370 (2017).
- 525 18. T. C. Tzeng *et al.*, A Fluorescent Reporter Mouse for Inflammasome Assembly Demonstrates an  
526 Important Role for Cell-Bound and Free ASC Specks during In Vivo Infection. *Cell Rep* **16**, 571-  
527 582 (2016).
- 528 19. G. C. Furtado *et al.*, Swift entry of myelin-specific T lymphocytes into the central nervous system  
529 in spontaneous autoimmune encephalomyelitis. *J Immunol* **181**, 4648-4655 (2008).
- 530 20. M. van Zwam *et al.*, Surgical excision of CNS-draining lymph nodes reduces relapse severity in  
531 chronic-relapsing experimental autoimmune encephalomyelitis. *J Pathol* **217**, 543-551 (2009).
- 532 21. M. J. C. Jordao *et al.*, Single-cell profiling identifies myeloid cell subsets with distinct fates during  
533 neuroinflammation. *Science* **363** (2019).
- 534 22. R. Brambilla, The contribution of astrocytes to the neuroinflammatory response in multiple  
535 sclerosis and experimental autoimmune encephalomyelitis. *Acta Neuropathol* **137**, 757-783  
536 (2019).
- 537 23. G. Ponath, C. Park, D. Pitt, The Role of Astrocytes in Multiple Sclerosis. *Front Immunol* **9**, 217  
538 (2018).
- 539 24. M. Pekny, M. Pekna, Astrocyte reactivity and reactive astrogliosis: costs and benefits. *Physiol*  
540 *Rev* **94**, 1077-1098 (2014).
- 541 25. M. V. Sofroniew, H. V. Vinters, Astrocytes: biology and pathology. *Acta Neuropathol* **119**, 7-35  
542 (2010).
- 543 26. S. A. Liddel *et al.*, Neurotoxic reactive astrocytes are induced by activated microglia. *Nature*  
544 **541**, 481-487 (2017).
- 545 27. N. Itoh *et al.*, Cell-specific and region-specific transcriptomics in the multiple sclerosis model:  
546 Focus on astrocytes. *Proc Natl Acad Sci U S A* **115**, E302-E309 (2018).
- 547 28. F. Haroon *et al.*, Gp130-dependent astrocytic survival is critical for the control of autoimmune  
548 central nervous system inflammation. *J Immunol* **186**, 6521-6531 (2011).
- 549 29. W. C. Chou *et al.*, AIM2 in regulatory T cells restrains autoimmune diseases. *Nature*  
550 10.1038/s41586-021-03231-w (2021).
- 551 30. C. J. Zhang *et al.*, TLR-stimulated IRAK4 activates caspase-8 inflammasome in microglia and  
552 promotes neuroinflammation. *J Clin Invest* **128**, 5399-5412 (2018).
- 553 31. A. Pronin *et al.*, Inflammasome Activation Induces Pyroptosis in the Retina Exposed to Ocular  
554 Hypertension Injury. *Front Mol Neurosci* **12**, 36 (2019).
- 555 32. A. C. Sahillioglu, F. Sumbul, N. Ozoren, T. Haliloglu, Structural and dynamics aspects of ASC  
556 speck assembly. *Structure* **22**, 1722-1734 (2014).
- 557 33. M. Moriya *et al.*, Role of charged and hydrophobic residues in the oligomerization of the PYRIN  
558 domain of ASC. *Biochemistry* **44**, 575-583 (2005).
- 559 34. A. Lu *et al.*, Unified polymerization mechanism for the assembly of ASC-dependent  
560 inflammasomes. *Cell* **156**, 1193-1206 (2014).
- 561 35. F. I. Schmidt *et al.*, A single domain antibody fragment that recognizes the adaptor ASC defines  
562 the role of ASC domains in inflammasome assembly. *J Exp Med* **213**, 771-790 (2016).
- 563 36. N. B. Bryan *et al.*, Differential splicing of the apoptosis-associated speck like protein containing a  
564 caspase recruitment domain (ASC) regulates inflammasomes. *Journal of inflammation (London,*  
565 *England)* **7**, 23 (2010).

- 566 37. A. Viedma-Poyatos, Y. de Pablo, M. Pekny, D. Perez-Sala, The cysteine residue of glial fibrillary  
567 acidic protein is a critical target for lipoxidation and required for efficient network organization.  
568 *Free Radic Biol Med* **120**, 380-394 (2018).
- 569 38. G. dos Santos *et al.*, Vimentin regulates activation of the NLRP3 inflammasome. *Nat Commun* **6**,  
570 6574 (2015).
- 571 39. S. Shalini, L. Dorstyn, S. Dawar, S. Kumar, Old, new and emerging functions of caspases. *Cell*  
572 *Death Differ* **22**, 526-539 (2015).
- 573 40. A. Erturk, Y. Wang, M. Sheng, Local pruning of dendrites and spines by caspase-3-dependent  
574 and proteasome-limited mechanisms. *J Neurosci* **34**, 1672-1688 (2014).
- 575 41. D. J. Simon *et al.*, A caspase cascade regulating developmental axon degeneration. *J Neurosci*  
576 **32**, 17540-17553 (2012).
- 577 42. Z. Li *et al.*, Caspase-3 activation via mitochondria is required for long-term depression and AMPA  
578 receptor internalization. *Cell* **141**, 859-871 (2010).
- 579 43. P. E. Mouser, E. Head, K. H. Ha, T. T. Rohn, Caspase-mediated cleavage of glial fibrillary acidic  
580 protein within degenerating astrocytes of the Alzheimer's disease brain. *Am J Pathol* **168**, 936-  
581 946 (2006).
- 582 44. L. Acarin *et al.*, Caspase-3 activation in astrocytes following postnatal excitotoxic damage  
583 correlates with cytoskeletal remodeling but not with cell death or proliferation. *Glia* **55**, 954-965  
584 (2007).
- 585 45. R. Aras, A. M. Barron, C. J. Pike, Caspase activation contributes to astrogliosis. *Brain Res* **1450**,  
586 102-115 (2012).
- 587 46. S. Villapol, L. Acarin, M. Faiz, B. Castellano, B. Gonzalez, Survivin and heat shock protein 25/27  
588 colocalize with cleaved caspase-3 in surviving reactive astrocytes following excitotoxicity to the  
589 immature brain. *Neuroscience* **153**, 108-119 (2008).
- 590 47. B. Hu *et al.*, The DNA-sensing AIM2 inflammasome controls radiation-induced cell death and  
591 tissue injury. *Science* **354**, 765-768 (2016).
- 592 48. A. Di Micco *et al.*, AIM2 inflammasome is activated by pharmacological disruption of nuclear  
593 envelope integrity. *Proc Natl Acad Sci U S A* **113**, E4671-4680 (2016).
- 594 49. A. Dumas *et al.*, The inflammasome pyrin contributes to pertussis toxin-induced IL-1beta  
595 synthesis, neutrophil intravascular crawling and autoimmune encephalomyelitis. *PLoS Pathog* **10**,  
596 e1004150 (2014).
- 597 50. E. G. O'Koren, R. Mathew, D. R. Saban, Fate mapping reveals that microglia and recruited  
598 monocyte-derived macrophages are definitively distinguishable by phenotype in the retina. *Sci*  
599 *Rep* **6**, 20636 (2016).
- 600 51. L. M. Holt, S. T. Stoyanof, M. L. Olsen, Magnetic Cell Sorting for In Vivo and In Vitro Astrocyte,  
601 Neuron, and Microglia Analysis. *Curr Protoc Neurosci* **88**, e71 (2019).
- 602 52. K. J. Livak, T. D. Schmittgen, Analysis of relative gene expression data using real-time  
603 quantitative PCR and the 2(-Delta Delta C(T)) Method. *Methods* **25**, 402-408 (2001).

604

## 605 Figure Legends

606

607 **Figure 1. Inflammasome activation in the CNS during late EAE (A)** EAE disease score of WT  
608 ( $n=5$ ) vs. ASC-Citrine mice ( $n=4$ ). Mann-Whitney test of total AUC for disease was used. **(B, C)**  
609 Representative images **(B)** and quantification **(C)** of ASC specks in the iLNs of ASC-Citrine mice  
610 during EAE. Each datapoint represents a value of an average value from two cross-sections of  
611 both iLNs (25  $\mu\text{m}$  thickness) per mouse.  $n=5$  mice. One-way ANOVA,  $p=0.0006$ , with Dunnett's  
612 multiple comparisons test. Scale bar is 20  $\mu\text{m}$ . **(D)** Representative images of SC from ASC-Citrine  
613 mice at indicated time points during EAE. Scale bar is 300  $\mu\text{m}$ . **(E-H)** Representative image **(E,**  
614 **G)** and quantification **(F, H)** of ASC specks **(E, F)** and ASC strings **(G, H)** in SC from ASC-Citrine  
615 mice during EAE. Scale bar is 10  $\mu\text{m}$ . Each datapoint represents a value from one mouse ( $n=5$ ).  
616 Two coronal cross-sections (25  $\mu\text{m}$  thickness) of L5 SC from one mouse were quantified manually  
617 and averaged. One-way ANOVA with Dunnett's multiple comparisons tests **(C, F, H)**.  $^{ns} p>0.05$ ,  
618  $^{**} p < 0.01$ ,  $^{***} p < 0.001$ ,  $^{****} p < 0.0001$ . Error bars denote mean  $\pm$  SEM.

619

620 **Figure 2. No inflammasome activation in hematopoietic cells in the CNS during EAE. (A)**  
621 EAE disease scores of WT (BM donor) $\rightarrow$ WT (recipient) chimeras vs. WT $\rightarrow$ *Pycard*<sup>-/-</sup> chimeras.  
622  $n=7$ , combined from multiple experiments. **(B, C)** Comparison of EAE disease severity of  
623 WT $\rightarrow$ WT chimeras versus WT $\rightarrow$ *Pycard*<sup>-/-</sup> chimeras. Each datapoint represents a value from one  
624 mouse ( $n=7$ ), combined from multiple experiments. Area under curve (AUC) quantification of pre-  
625 peak disease **(B)**, AUC quantification of post-peak disease **(C)**. **(D, E)** Representative images **(D)**  
626 and quantification **(E)** of ASC specks in the iLNs of WT $\rightarrow$ ASC-Citrine chimeras versus ASC-  
627 Citrine $\rightarrow$ WT chimeras at 3 dpi of EAE. Each datapoint represents a value from one mouse as an  
628 average of both iLNs ( $n=4$ ). Mann-Whitney test was used. Scale bar is 20  $\mu\text{m}$ . **(F-H)**  
629 Representative images **(F)** and quantification of ASC specks **(G)** and ASC strings **(H)** of SC from  
630 WT $\rightarrow$ ASC-Citrine BM chimeras ( $n=4$ ) versus ASC-Citrine $\rightarrow$ WT chimeras ( $n=6$ ) at 30-dpi of EAE.  
631 Each datapoint represents a value from one mouse. Mann-Whitney test was used **(B, C, E, G, H)**.  
632 Scale bar is 300  $\mu\text{m}$ . **(B, C, G, H)**.  $^{ns} p>0.05$ ,  $^{*} p < 0.05$ ,  $^{**} p < 0.01$ ,  $^{***} p < 0.001$ . Error bars denote  
633 mean  $\pm$  SEM.

634

635 **Figure 3. Identifying inflammasome activation in CNS cells with an immunofluorescent**  
636 **approach. (A-C)** Representative images of ASC specks and strings counter-stained with  
637 antibodies against TMEM119 for microglia **(A)**, GFAP for astrocytes **(B)**, and NeuN for neurons  
638 **(C)** in SC from naïve versus 30-dpi EAE ASC-Citrine mice. Scale bar is 20  $\mu\text{m}$ . **(D, E)**  
639 Quantification of ASC specks **(D)** and ASC strings **(E)** in microglia, astrocytes, and neurons in the  
640 ventral horn (VH) of SC from naïve versus 30-dpi EAE ASC-Citrine mice. Two-way repeated  
641 measures (RM) ANOVAs were used (main effect of cell type:  $^{****} p < 0.0001$  **(D, E)**), with Sidak's  
642 multiple comparisons test post hoc ( $^{#} p < 0.05$ ,  $^{##} p < 0.01$ ). **(F)** Relative contribution of microglia,  
643 astrocytes and neurons to total number of ASC specks in L5 SC at 30-dpi EAE. "Unassigned"  
644 indicates unidentified cell sources of ASC-Citrine signals. Each datapoint represents a value  
645 from one mouse ( $n=5$ ). Two-way RM ANOVA was used (main effect of cell type:  $p < 0.001$ ) with  
646 Sidak's multiple comparisons test post hoc.  $^{**} p < 0.01$ . Error bars denote mean  $\pm$  SEM.

647

648 **Figure 4. Identifying Inflammasome activation in CNS cells by a mouse genetics approach.**  
649 **(A-C)** Representative images of SC in *Asc-Citrine*<sup>LSL</sup> versus *Cx3cr1*<sup>CreERT2</sup>;*Asc-Citrine*<sup>LSL</sup> mice **(A)**,  
650 *Gfap*<sup>Cre/+</sup>;*Asc-Citrine*<sup>LSL</sup> mice **(B)**, and *Syn1*<sup>Cre/+</sup>;*Asc-Citrine*<sup>LSL</sup> mice **(C)** at day 30-dpi of EAE. Mice  
651 for microglia evaluation were treated with tamoxifen. Scale bar is 20  $\mu\text{m}$ . **(D, E)** Quantification of  
652 ASC specks **(D)** and ASC strings **(E)** in SC VH of mice indicated in **(A-C)**. Each datapoint  
653 represents a value from one mouse. Combined from multiple experiments. **(D, E)** Mann-Whitney  
654 test was used.  $^{****} p < 0.0001$ . Error bars denote mean  $\pm$  SEM.

655  
656 **Figure 5. Evaluation of astrocytes with activated inflammasomes. (A, B)** Representative  
657 images (A) and quantification (B) of total GFAP intensity in SC ventral gray matter from naïve 30-  
658 dpi EAE mice. Scale bar is 200  $\mu\text{m}$ . GFAP intensity was quantified as mean signal intensity of  
659 GFAP in the ventral grey matter (VGM) using ImageJ. Mann-Whitney test was used. **(C-E)**  
660 Representative images (C) and quantification of GFAP intensity (D) and C3d intensity (E) per cell  
661 in gray matter SC astrocytes with and without ASC specks/strings from naïve ASC-Citrine ( $n=7$ )  
662 mice versus ASC-Citrine mice at 30-dpi of EAE ( $n=6$ ). Scale bar is 200  $\mu\text{m}$ . Each datapoint  
663 represents a value from one mouse. Individual astrocytes were identified using the Imaris  
664 software and the mean intensity per cell was quantified for GFAP and C3d. Two-way RM ANOVA  
665 was used with Sidak's multiple comparisons test post-hoc.  $**p<0.01$ .  $***p<0.001$ . Error bars  
666 denote mean  $\pm$  SEM.

667  
668 **Figure 6. Outcomes of inflammasome activation in astrocytes. (A, B)** RT-qPCR evaluation  
669 of inflammasome-related genes in SC total cells vs. astrocytes isolated from mice with EAE at 30-  
670 dpi. Two-way RM ANOVAs were used with Sidak's multiple comparisons test post-hoc. **(C)**  
671 Representative images of Western blotting for inflammasome components in BMDMs vs. C8-S  
672 cells. Cells in all groups were pre-treated with Ultrapure LPS. Groups in Lane 2 and 3 were further  
673 stimulated with nigericin and poly(dA:dT)/liposome to activate the NLRP3 and AIM2  
674 inflammasomes, respectively. (Cells in Group1 were treated by Ultrapure LPS alone.) **(D, E)**  
675 Representative images (D) and quantification (E) of TUNEL staining of SC sections from naïve  
676 ( $n=3$ ) and 30-dpi EAE ASC-Citrine mice ( $n=4$ ). Two-way repeated measures (RM) ANOVAs was  
677 used. Scale bar is 75  $\mu\text{m}$ . **(F, G)** Representative images (F) and quantification (G) of active  
678 caspase-3 (CC3) in SC astrocytes with and without ASC specks/strings. Evaluated from naïve  
679 ( $n=7$ ) and at 30-dpi EAE ( $n=6$ ) ASC-Citrine mice. Scale bar is 200  $\mu\text{m}$ . Individual astrocytes were  
680 identified using the Imaris software and were quantified by CC3 puncta staining. Each datapoint  
681 represents a value from one mouse, combined from multiple experiments. Two-way RM ANOVA  
682 was used with Sidak's multiple comparison test post-hoc. (A, B, E, G)  $**p<0.01$ ,  $***p<0.001$ ,  
683  $****p<0.0001$ . Error bars denote mean  $\pm$  SEM.

684  
685 **Figure 7. AIM2 inflammasome activation in astrocytes during EAE. (A, B)** Comparison of  
686 ASC speck formation in indicated mouse groups. Representative images (A) and quantification  
687 of ASC specks (B) of SC sections from ASC-Citrine ( $n=6$ ) versus *Nlrp3*<sup>-/-</sup> ASC-Citrine ( $n=7$ ) mice  
688 at 30-dpi Type B EAE. Mann-Whitney test was used. **(C, D)** EAE disease scores (C) and statistical  
689 evaluation of AUC (D) of WT ( $n=8$ ) versus *Aim2*<sup>-/-</sup> ( $n=7$ ) mice induced with Type-A EAE with low  
690 dose *Mtb* (50  $\mu\text{g}/\text{mouse}$ ). Mann-Whitney test of AUC was used to analyze post-peak disease (D).  
691 **(E)** Quantification of GFAP intensity per cell in gray matter SC astrocytes from WT ( $n=3$ ) versus  
692 *Aim2*<sup>-/-</sup> ( $n=4$ ) mice at 30-dpi of Type-A EAE with low dose *Mtb* (50  $\mu\text{g}/\text{mouse}$ ). Unpaired t-test was  
693 used. **(F-H)** Type-A EAE with 200  $\mu\text{g}$  *Mtb*/mouse. EAE disease score of ASC-Citrine ( $n=8$ ), *Aim2*<sup>-/-</sup>  
694 ;ASC-Citrine ( $n=6$ ), *Aim2*<sup>-/-</sup>; ASC-Citrine ( $n=4$ ) mice (F). Representative images (G) and  
695 quantification of ASC specks (H) of SC sections at 30-dpi EAE. Scale bar is 200 $\mu\text{m}$  (A, G). One-  
696 way ANOVA was used ( $p < 0.0001$ ) with Dunnet's multiple comparisons test post-hoc (H).  
697 Unpaired t-test was used. (B,D,E). Each datapoint represents a value from one mouse (B, D, E,  
698 H). *ns*; not significant ( $p>0.05$ ),  $*p<0.05$ ,  $**p<0.01$ . Error bars denote mean  $\pm$  SEM.

699  
700 **Figure S1. Validation of ASC-Citrine system in tissue imaging. (A)** Representative images of  
701 ASC speck formation detected with ASC-Citrine and ASC antibody signals. Live spleen tissue  
702 culture slices from naïve WT and ASC-Citrine mice were used with NLRP3 inflammasome  
703 stimulation. Scale bar is 50  $\mu\text{m}$ . **(B)** Quantification of ASC specks in the iLNs and cLNs of ASC-  
704 Citrine mice during EAE. Each datapoint represents a value of an average value from two cross-

705 sections of LNs (25  $\mu\text{m}$  thickness) from one mouse. One-way ANOVA,  $p=0.0021$  (iLN),  $p=0.3235$   
706 (cLN), with Dunnett's multiple comparisons test. **(C, D)** Comparison of ASC speck images and  
707 numbers in SC between Type-A and Type-B EAE. Representative images (C) and quantification  
708 (D) of ASC specks in the SC of ASC-Citrine mice at 30-dpi for Type A ( $n=5$ ) and Type B ( $n=8$ )  
709 EAE. Each datapoint represents a value from one mouse. Mann-Whitney test was used. Scale  
710 bar is 200  $\mu\text{m}$ . **(B,D)** *ns*; not significant ( $p>0.05$ ),  $*p<0.05$ ,  $**p<0.01$ . Error bars denote mean  $\pm$   
711 SEM.

712

713 **Figure S2. Validation of Bone Marrow Chimeras.** BM chimera were created by transferring WT  
714 BM cells to irradiated WT or *Pycard*<sup>-/-</sup> recipients ( $n=7$  for each group). Reconstitution efficiency  
715 of BM chimeras determined by flow cytometry, quantified as % of total CD45<sup>+</sup> cells in peripheral  
716 blood for congenic markers of CD45.1 (donor) or CD45.2 (recipient). Each datapoint represents  
717 a value from one mouse. Mann-Whitney test used. **(B, C)** BM chimera were created by  
718 transferring ASC-Citrine BM cells irradiated WT recipients (ASC-Citrine  $\rightarrow$  WT,  $n=6$ ) and vice  
719 versa (WT  $\rightarrow$  ASC-Citrine mice,  $n=8$ ). Reconstitution efficiency (B) and EAE disease score (C) of  
720 indicated BM chimera Mann-Whitney test of total AUC for disease. **(D)** Representative images of  
721 SC from ASC-Citrine  $\rightarrow$  WT mice at indicated time points during EAE. No apparent ASC specks  
722 were observed. Scale bar is 500  $\mu\text{m}$ . **(E)** Representative image of ALDH1L1 counterstaining of  
723 astrocytes in ASC-Citrine mice at 30-dpi EAE. Scale bar is 10  $\mu\text{m}$ . **(F)** Representative images of  
724 ASC specks and strings counter-stained with antibodies against NG2 (for OPCs) and MBP (for  
725 mature oligodendrocytes) in SC from naïve versus 30-dpi EAE ASC-Citrine mice. Scale bar is 20  
726  $\mu\text{m}$ . **(G)** Quantification of ASC specks in OPCs and mature oligodendrocytes of SC from naïve  
727 versus 30-dpi EAE ASC-Citrine mice. Each datapoint represents a value from one mouse. Two-  
728 way repeated measures (RM) ANOVA was used (main effect of cell type: <sup>ns</sup> $p<0.7807$ ). **(H)**  
729 Percentages of ASC specks detected in OPC or mature oligodendrocytes out of total ASC specks  
730 per section, indicating relative contribution of OPCs and oligodendrocyte ASC specks to total  
731 number of ASC specks in L5 spinal cord at 30-dpi EAE. **(A,B,C,G,H)** *ns*; not significant ( $p>0.05$ ).  
732 Error bars denote mean  $\pm$  SEM. **(I)** Percentage of ChAT<sup>+</sup> and ChAT<sup>-</sup> VH neurons containing  
733 ASC specks in SC from naïve vs. 30-dpi EAE ASC-Citrine mice. Each datapoint represents a  
734 value from one mouse ( $n=5$ ). Two-way RM ANOVA was used (main effect of cell type:  $p<0.001$ )  
735 with Sidak's multiple comparisons test post hoc.  $**p<0.01$ .

736

737 **Figure S3. Validation of EAE mice with cell type-specific ASC-Citrine expression.** **(A)**  
738 Tamoxifen mediated expression of ASC-citrine reporter expression in microglia and splenic  
739 monocytes in *Cx3cr1*<sup>CreERT2</sup>;*Asc-Citrine*<sup>LSL</sup> with or without tamoxifen (TAM) treatment. **(B)** Flow  
740 cytometry gating strategy for identifying microglia. **(C)** EAE disease score of *Cx3cr1*<sup>CreERT2</sup>;*Asc-*  
741 *Citrine*<sup>LSL</sup> ( $n=5$ ) vs. *Cx3cr1*<sup>CreERT2</sup>;*Asc-Citrine*<sup>LSL</sup> ( $n=5$ ). Both groups were treated with TAM. **(D, E)**  
742 EAE disease score of *Asc-Citrine*<sup>LSL</sup> ( $n=10$ ) vs. *Gfap*<sup>Cre</sup>;*Asc-Citrine*<sup>LSL</sup> ( $n=13$ ) (D) and *Asc-*  
743 *Citrine*<sup>LSL</sup> ( $n=13$ ) vs. *Syn1*<sup>Cre</sup>;*Asc-Citrine*<sup>LSL</sup> ( $n=10$ ) (E). Mann-Whitney test of total AUC of disease  
744 score was used (C,D,E). *ns*; not significant ( $p>0.05$ ). Error bars denote mean  $\pm$  SEM.

745

746 **Figure S4. Expression of inflammasome components and cell death markers in astrocytes**  
747 **during EAE.** **(A)** Gene-set enrichment analysis of inflammasome-associated genes in bulk SC  
748 lysates and astrocytes (with astrocyte-specific Ribotag-HA enriched RNA) in naïve and 30-dpi  
749 EAE mice. Data represented as raw transcript counts derived from publicly available data (GEO  
750 Accession #: GSE100329). **(B-G)** Representative images (B-D) and quantification (E-F) of  
751 caspase-1 (B, E), IL-1 $\beta$  (C, F), and GSDMD (D, G) expression in spleen and SC astrocytes from



752 naïve versus 30-dpi EAE ASC-Citrine mice. Scale bar is 20  $\mu\text{m}$ . Each datapoint represents a  
753 value from one mouse. Individual astrocytes were identified using the Imaris software and the  
754 mean intensity per cell was quantified for caspase-1 (E), IL-1 $\beta$  (F) and GSDMD (G). Mann-  
755 Whitney test was used. (E-G) *ns*; not significant ( $p>0.05$ ). Error bars denote mean  $\pm$  SEM.

756  
757 **Figure S5. Expression of inflammasome components in C8-S astrocyte cell line (A-C)** WB  
758 quantitative evaluation of culture supernatant samples of mature caspase-1 (A), IL-1 $\beta$  (B), and IL-  
759 18 (C). **(D-H)** WB quantitative evaluation of cell lysate samples of pro-caspase-1 (D), pro-IL-1 $\beta$   
760 (E), pro-IL-18 (F), GSDMD-FL (G), and GSDMD-NT (H). In (A-H), all groups were stimulated with  
761 Ultrapure LPS, and Groups 2 and 3 were further stimulated with nigericin and  
762 poly(dA:dT)/liposome to activate the NLRP3 and AIM2 inflammasomes, respectively. (Thus,  
763 Group 1 has Ultrapure LPS treatment alone.) Each datapoint is obtained from one independent  
764 experiment. Two-way RM ANOVA was used with Sidak's multiple comparison test post-hoc. **(I)**  
765 Quantification of active caspase-3 (CC3) in spinal cord astrocytes with and without ASC  
766 specks/strings in *Gfap*<sup>Cre</sup>;*Asc-Citrine*<sup>LSL</sup> ( $n=6$ ) mice at 30-dpi EAE. Each datapoint represents a  
767 value from one mouse. Individual astrocytes were identified using the Imaris software and were  
768 quantified by CC3 puncta staining. Mann-Whitney test was used. (A-I) **\*\*** $p<0.01$ , **\*\*** $p<0.005$ ,  
769 **\*\*\*** $p<0.001$ , **\*\*\*\*** $p<0.0001$ . Error bars denote mean  $\pm$  SEM.

770  
771 **Figure S6. Validation of EAE phenotype of *Nlrp3*<sup>-/-</sup>;ASC-Citrine mice and immune**  
772 **phenotype of *Aim2*<sup>-/-</sup> mice with EAE. (A)** EAE disease score of ASC-Citrine ( $n=7$ ) vs. *Nlrp3*<sup>-/-</sup>  
773 ;ASC-Citrine ( $n=8$ ) mice with Type B-EAE. Mann-Whitney test of total AUC for disease score was  
774 used. **(B–D)** Leukocyte counts in SC (B), iLN (C) and spleen (D) at 16-dpi EAE in WT vs. *Aim2*<sup>-/-</sup>  
775 mice induced with Type-A EAE. One datapoint represents a value from one mouse. Two-way RM  
776 ANOVA was used with Sidak's multiple comparisons test post hoc. **(E)** Representative image of  
777 GFAP staining in SC from WT versus *Aim2*<sup>-/-</sup> mice at 30-dpi of EAE. Scale bar is 200  $\mu\text{m}$ . (A-D)  
778 *ns*; not significant ( $p>0.05$ ). Error bars denote mean  $\pm$  SEM.

779  
780

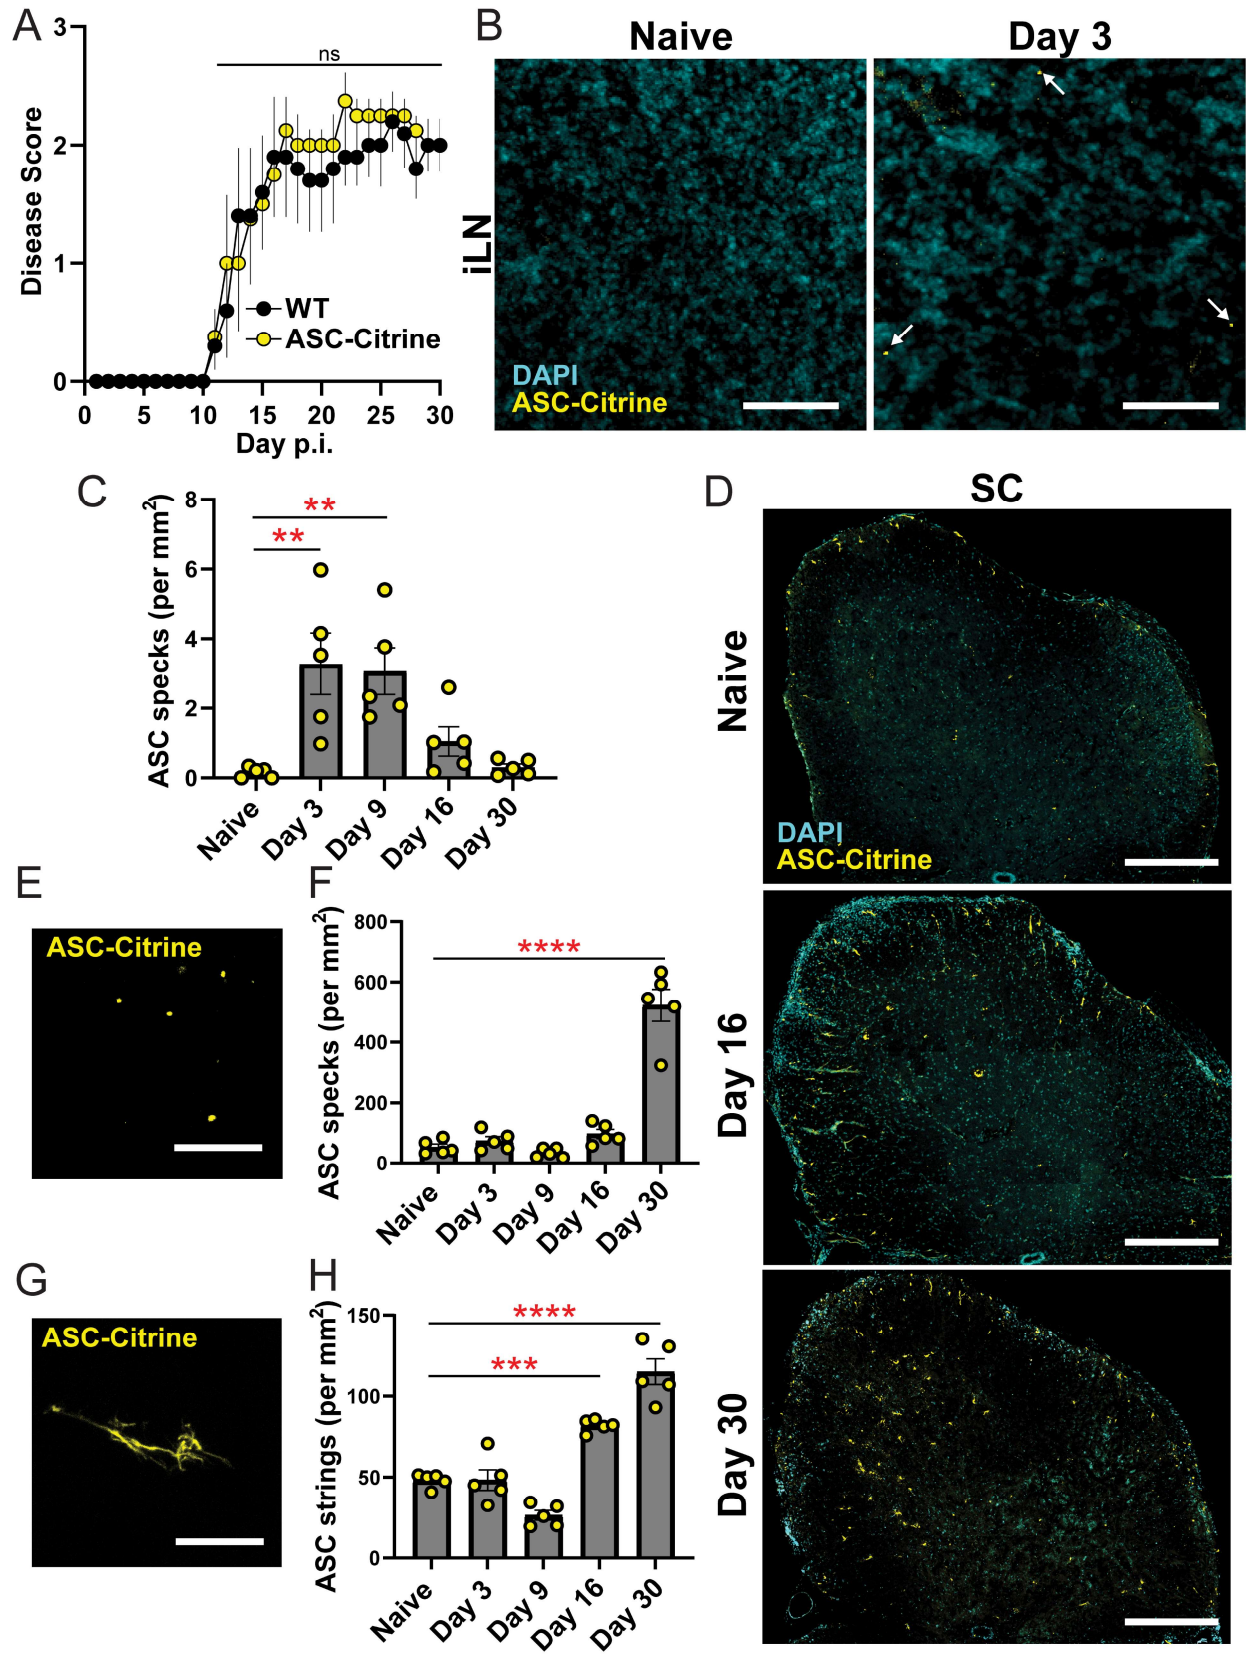

781  
782

Figure 1

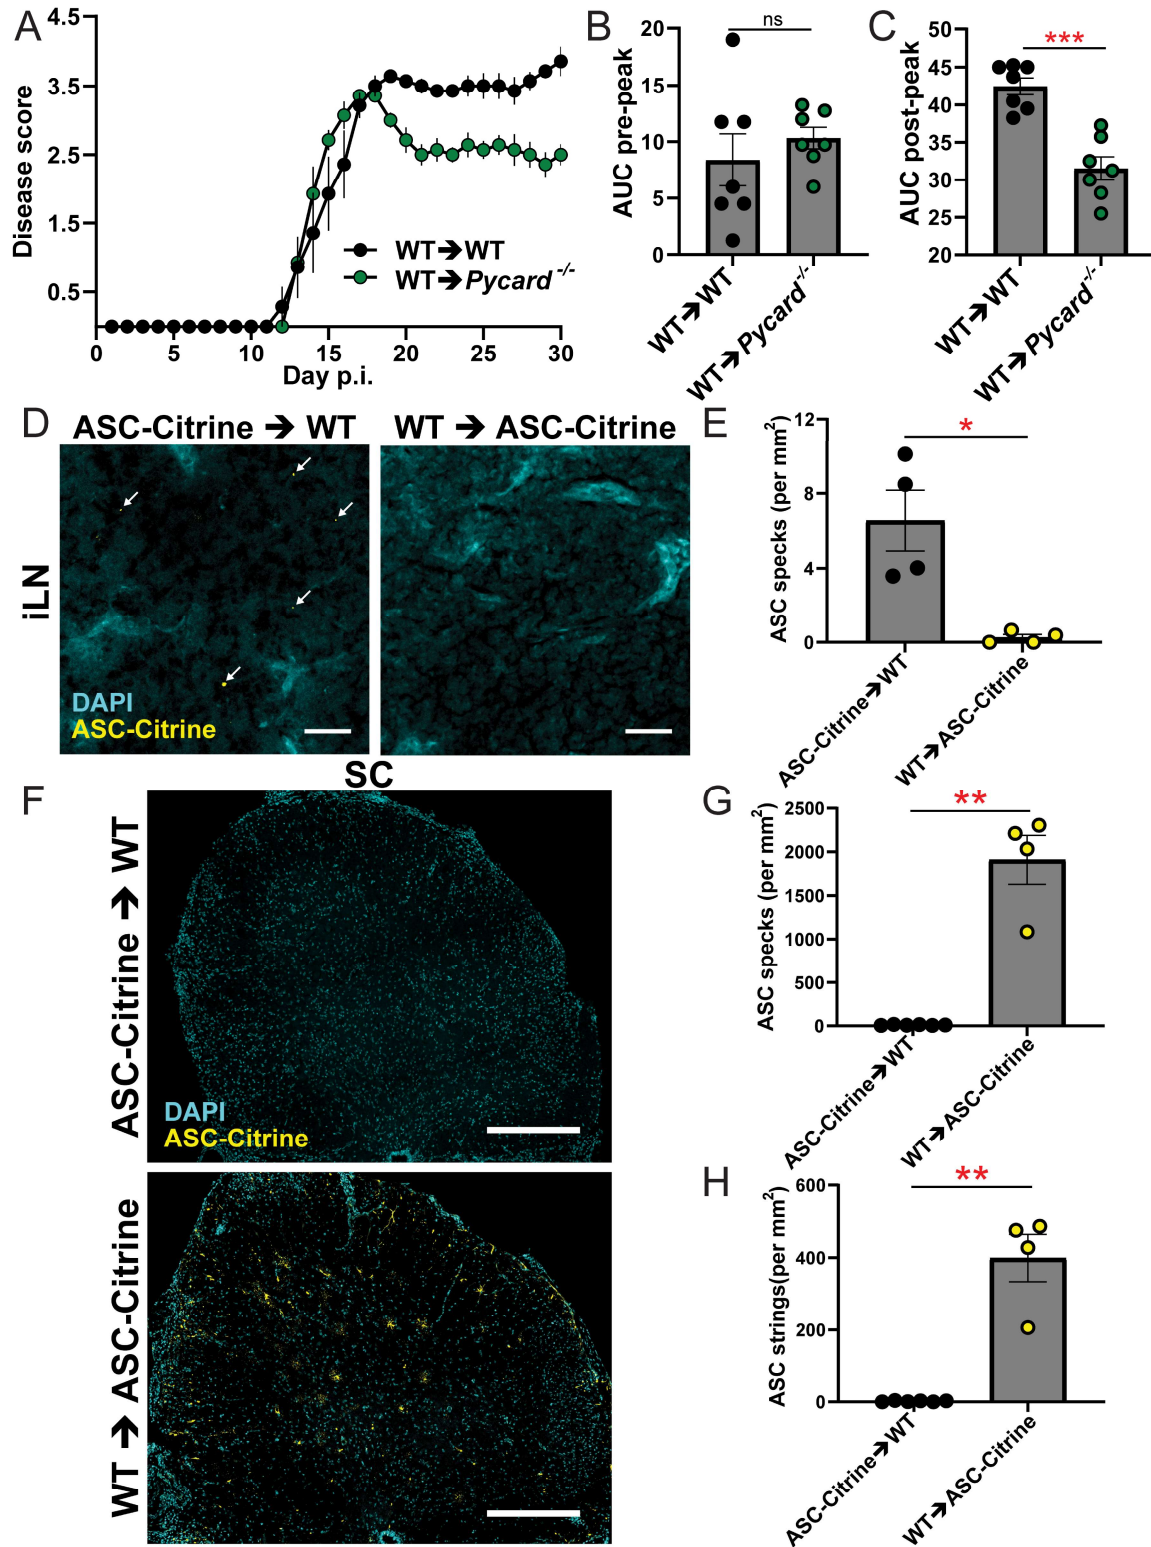

783

784

785 **Figure 2**

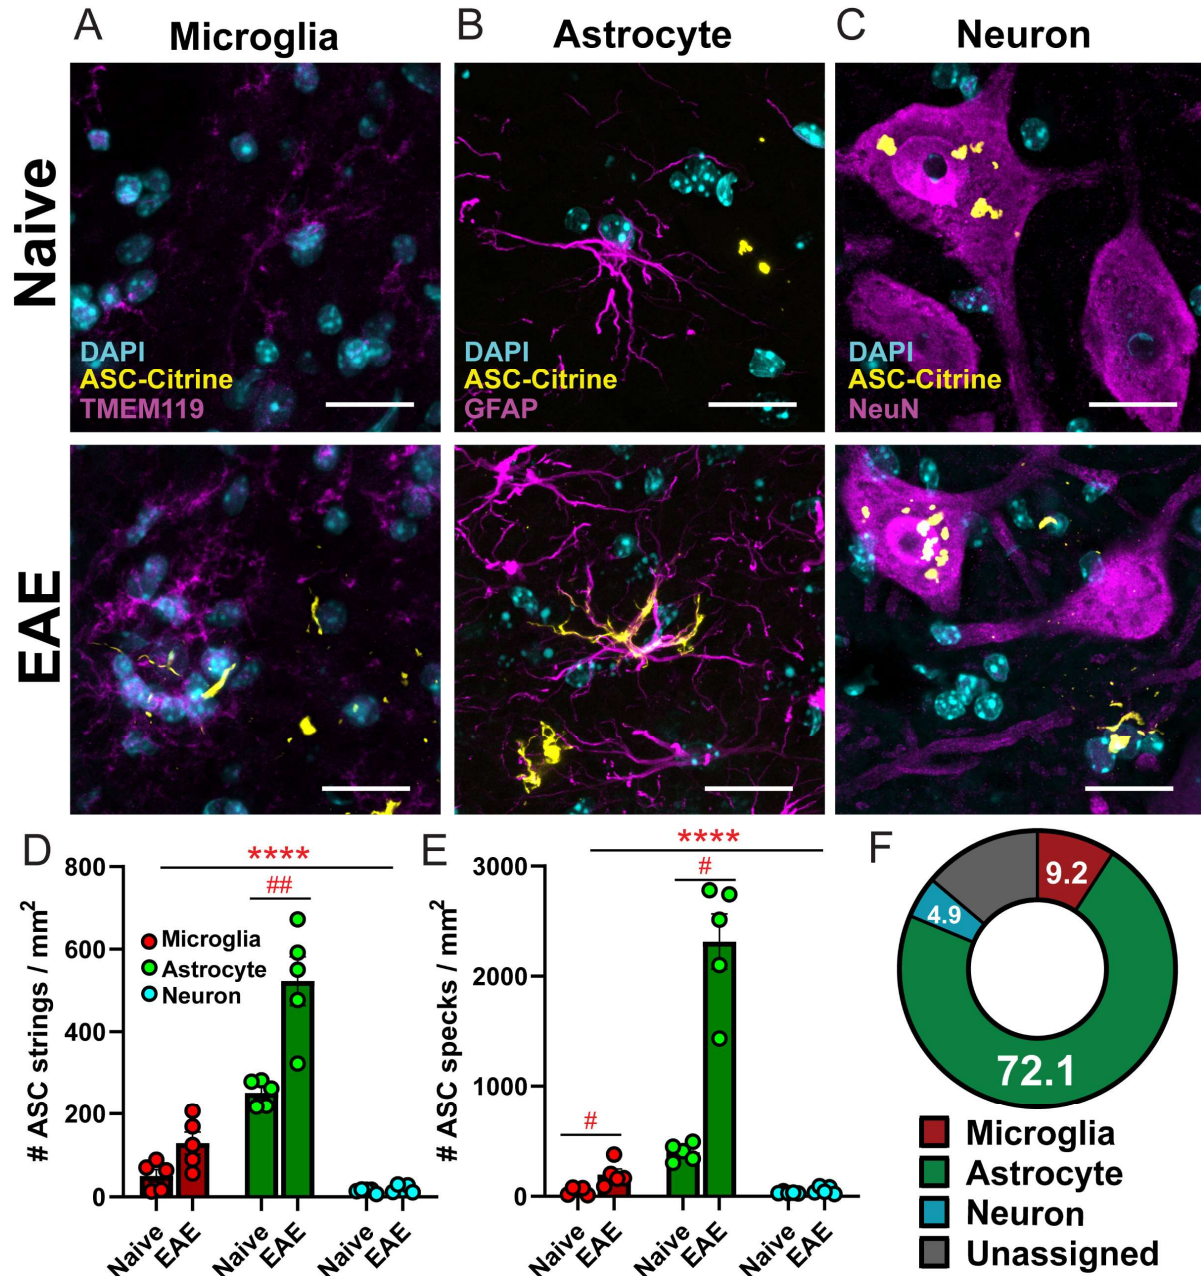

786  
787  
788  
789  
790  
791  
792  
793  
794  
795  
796

Figure 3

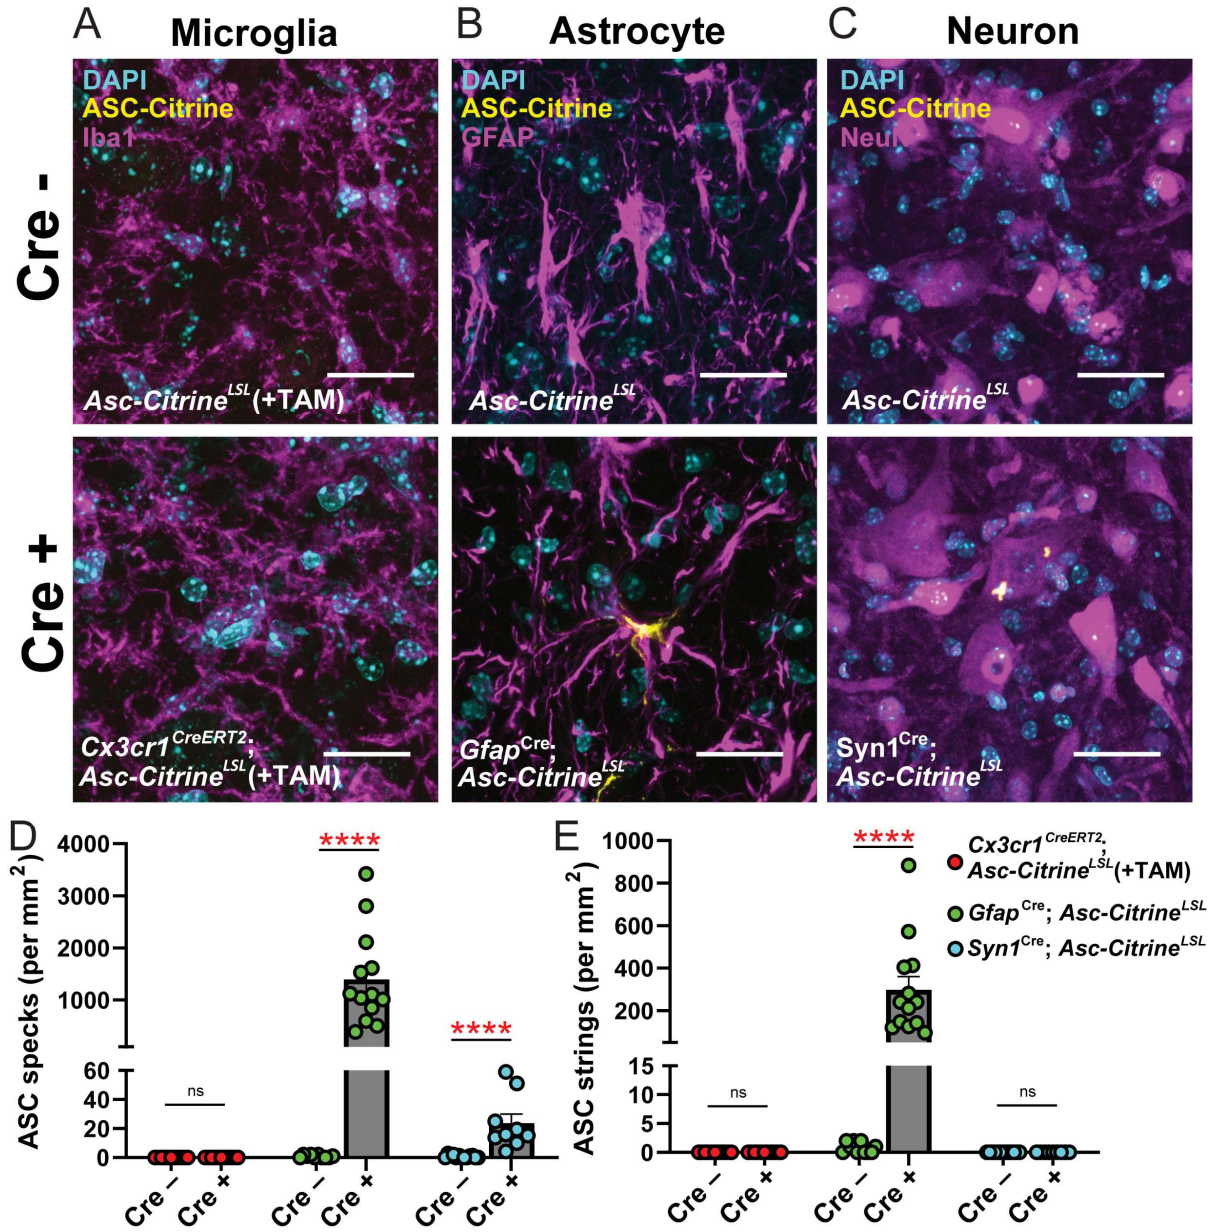

797  
 798  
 799  
 800  
 801  
 802  
 803  
 804  
 805  
 806  
 807  
 808  
 809  
 810  
 811

Figure 4

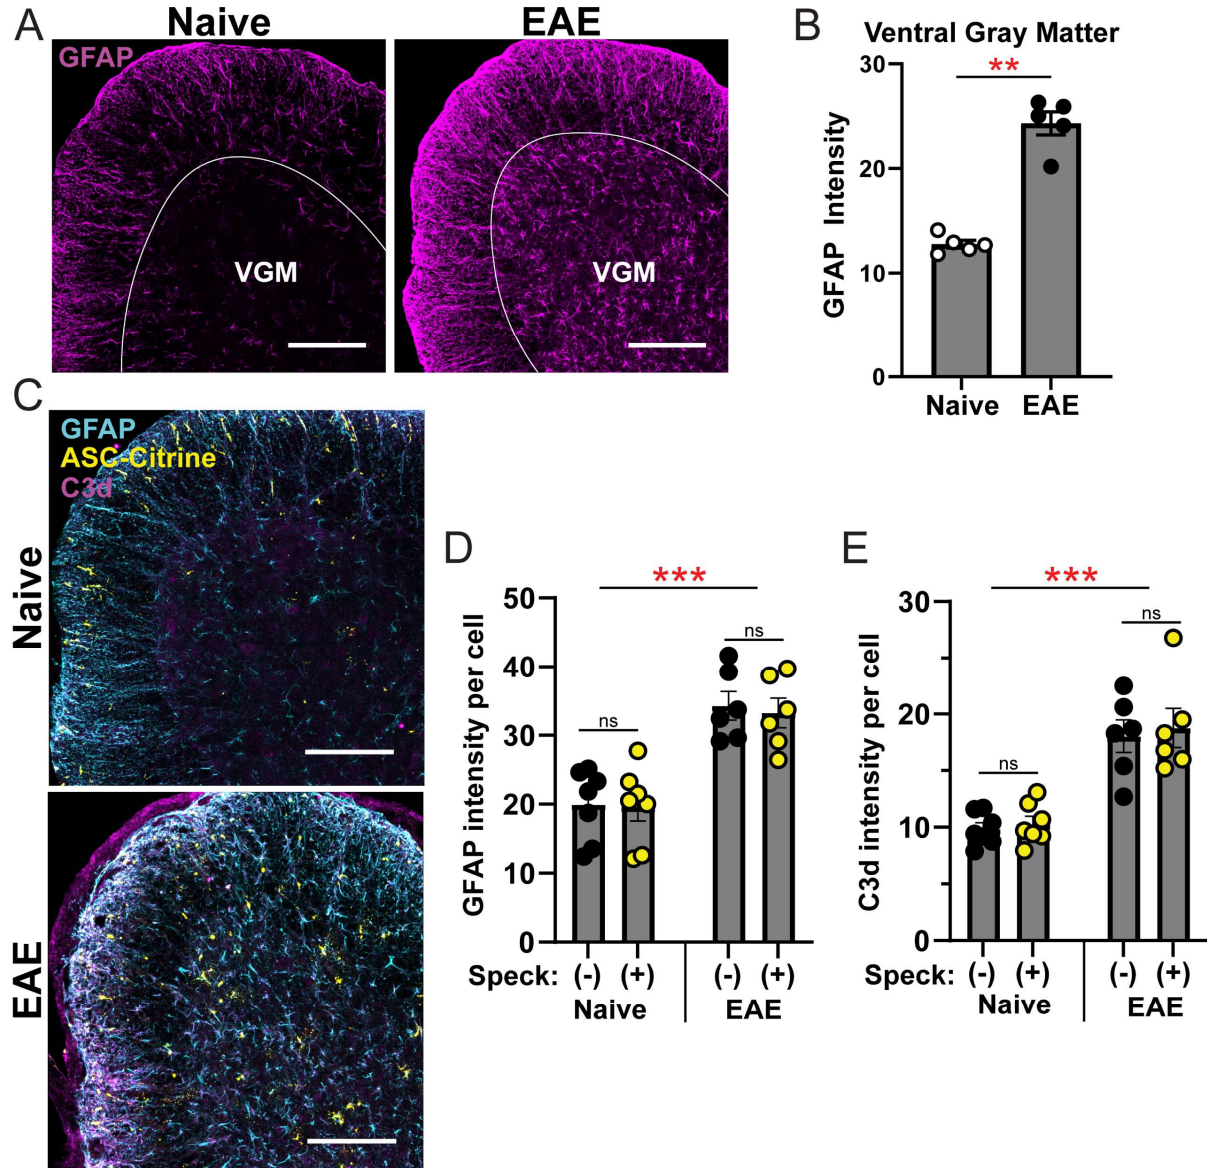

812  
813  
814  
815  
816  
817  
818  
819  
820  
821  
822  
823  
824  
825  
826  
827  
828

**Figure 5**

829

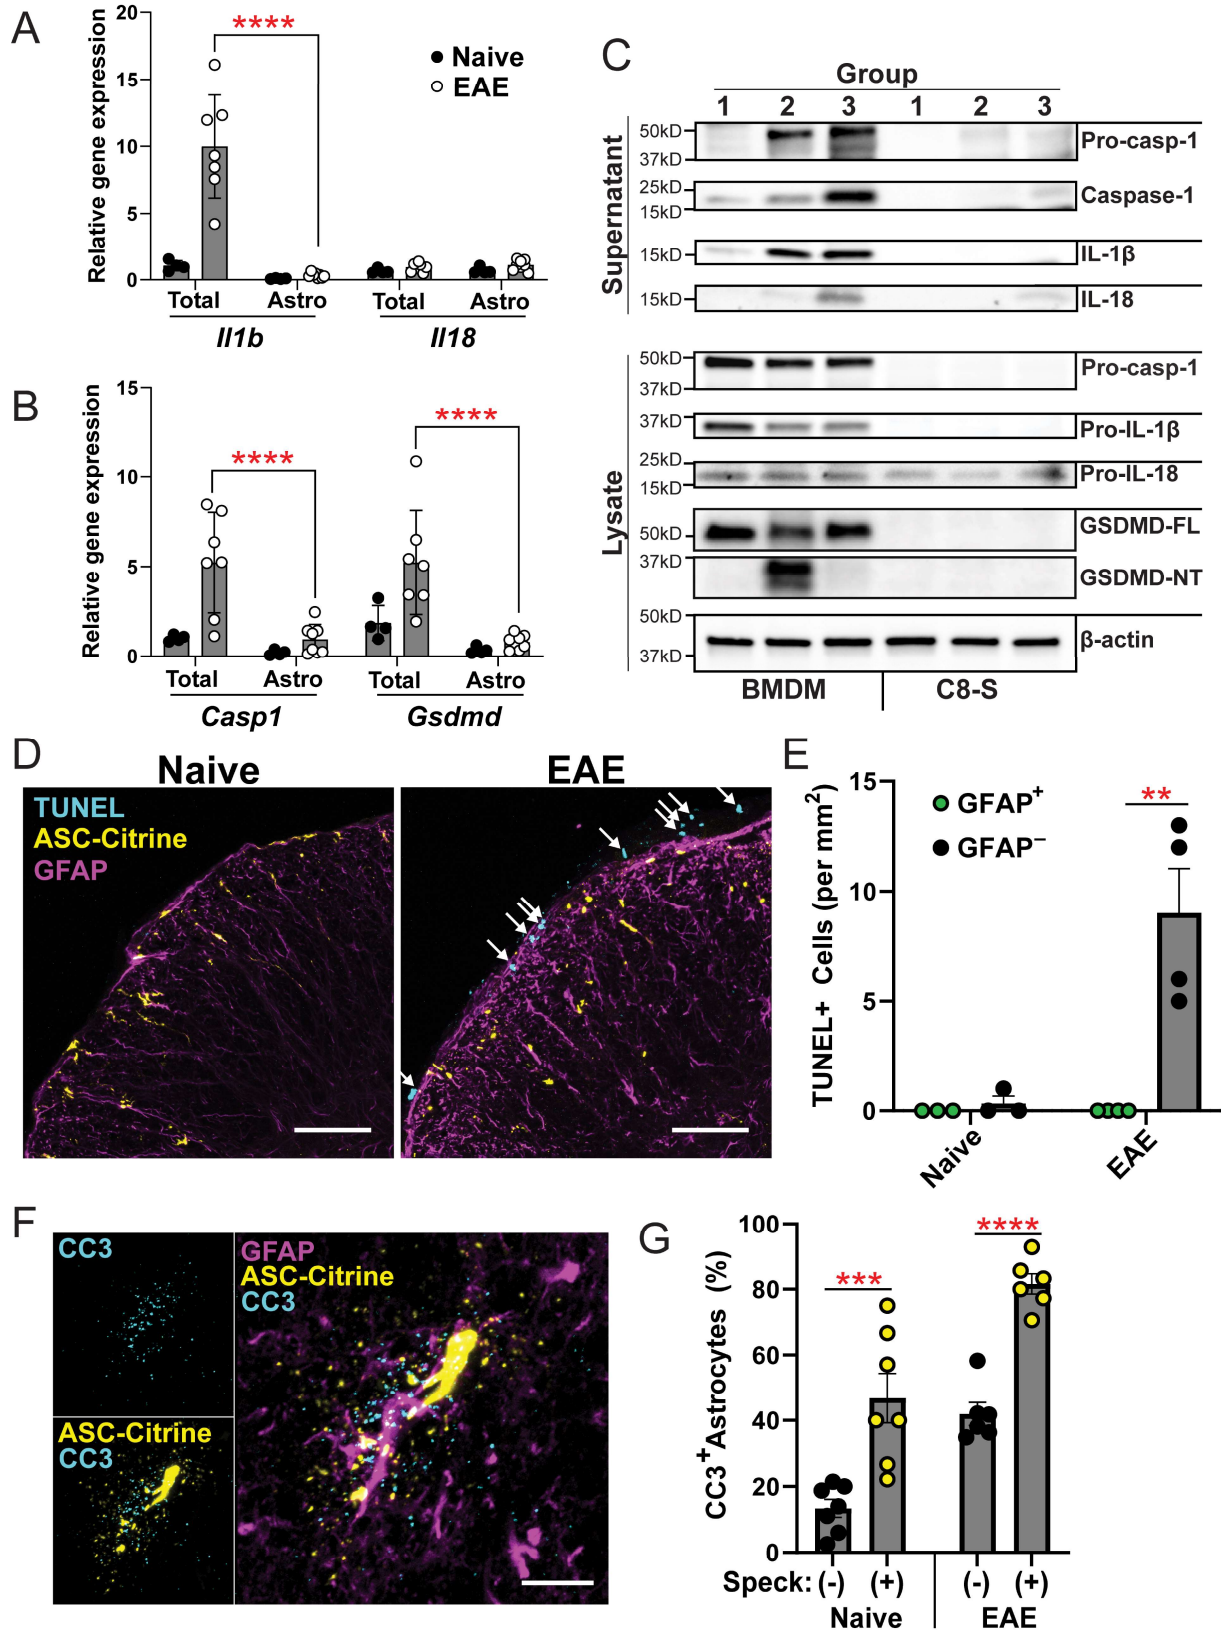

830

831

Figure 6

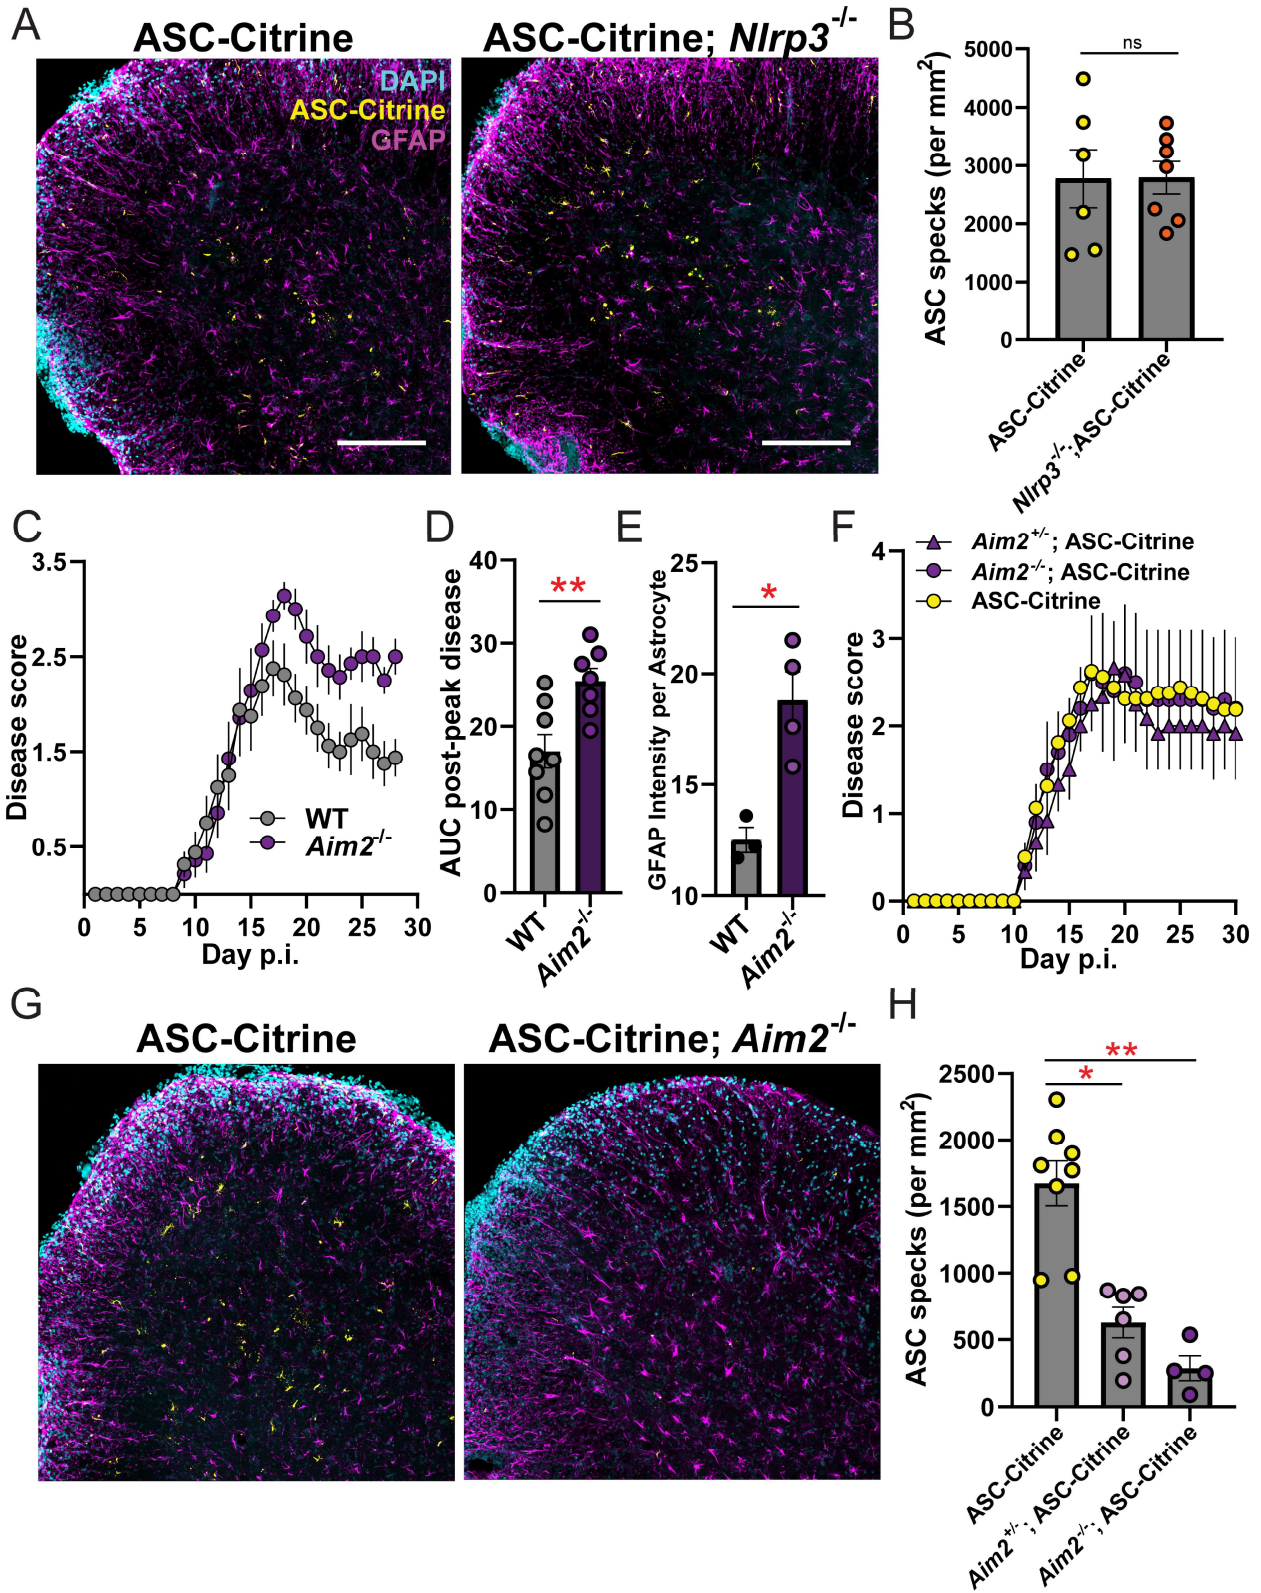

832  
833  
834  
835

Figure 7



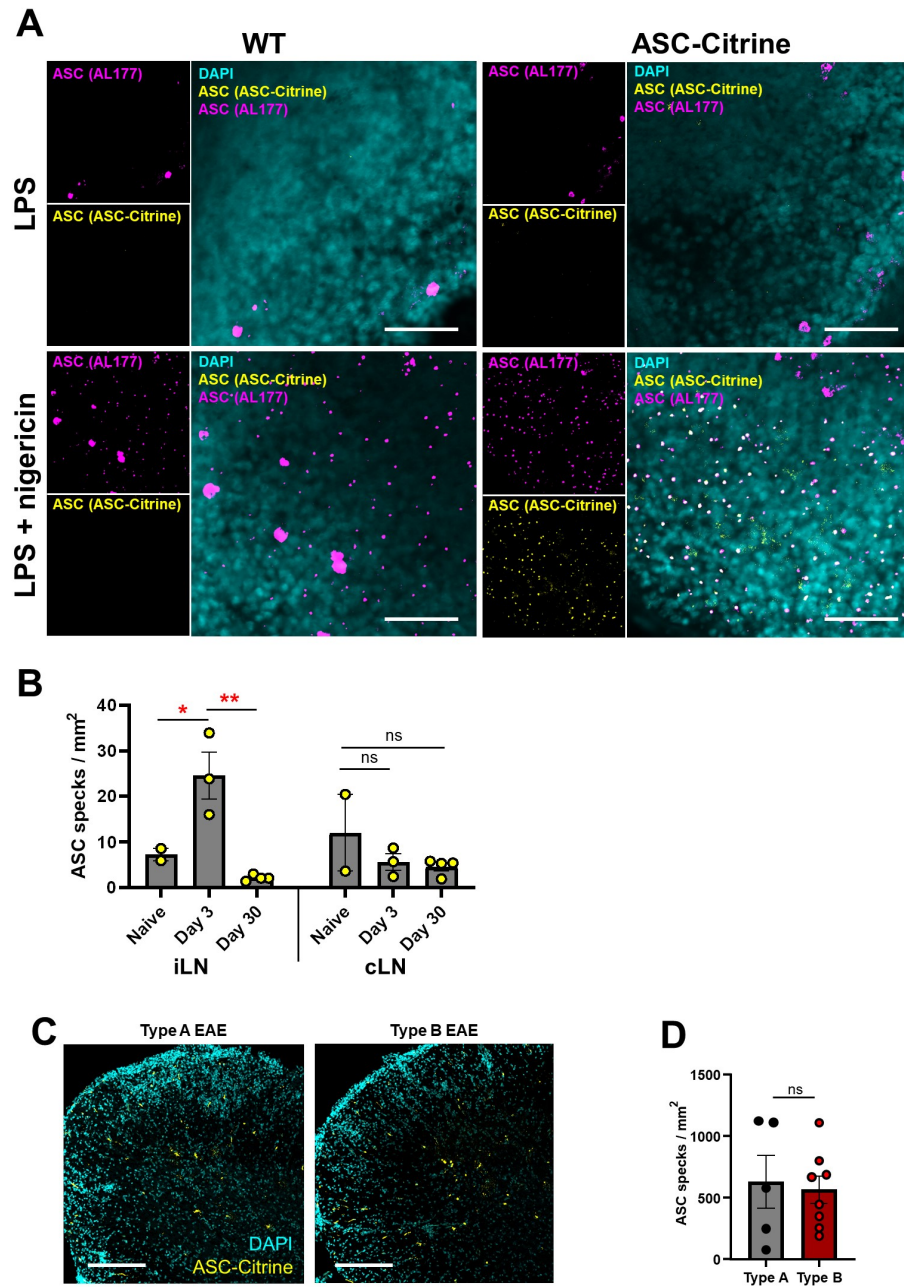

Figure S1

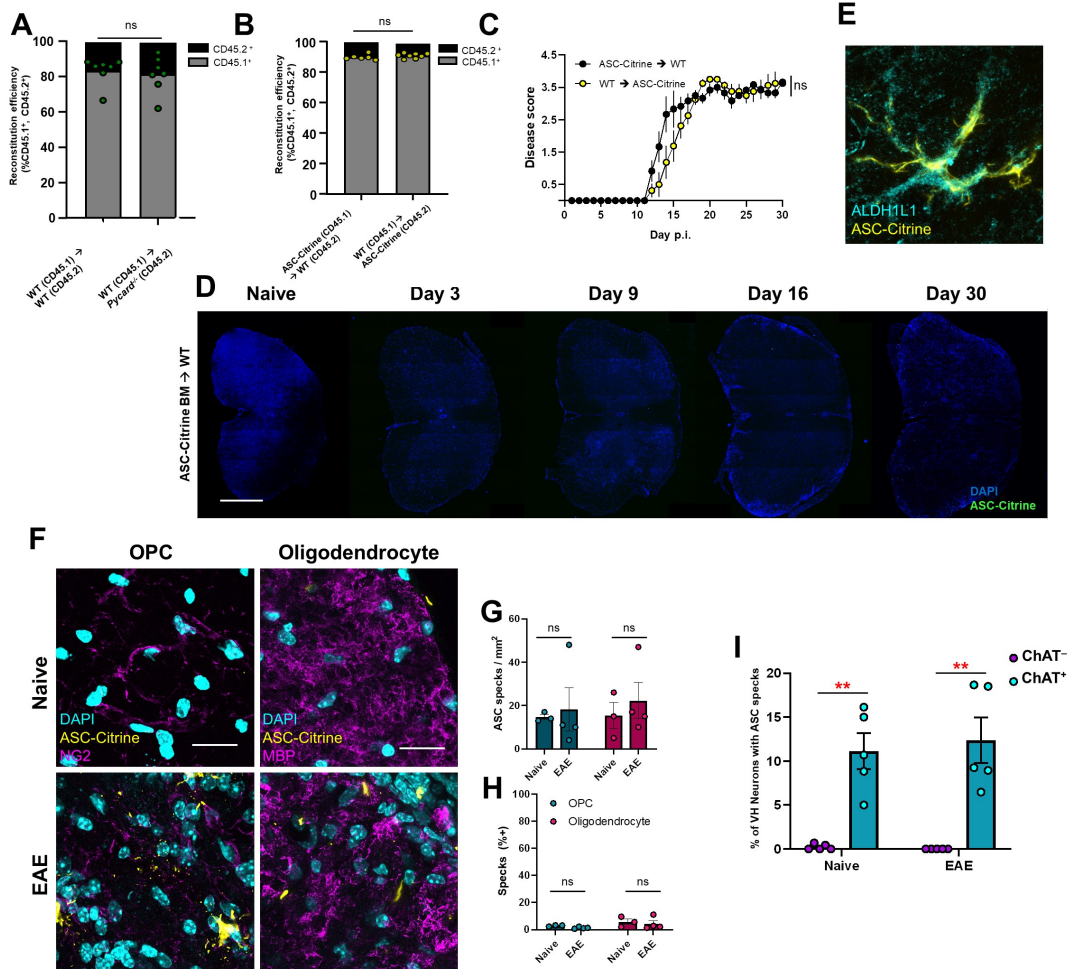

Figure S2

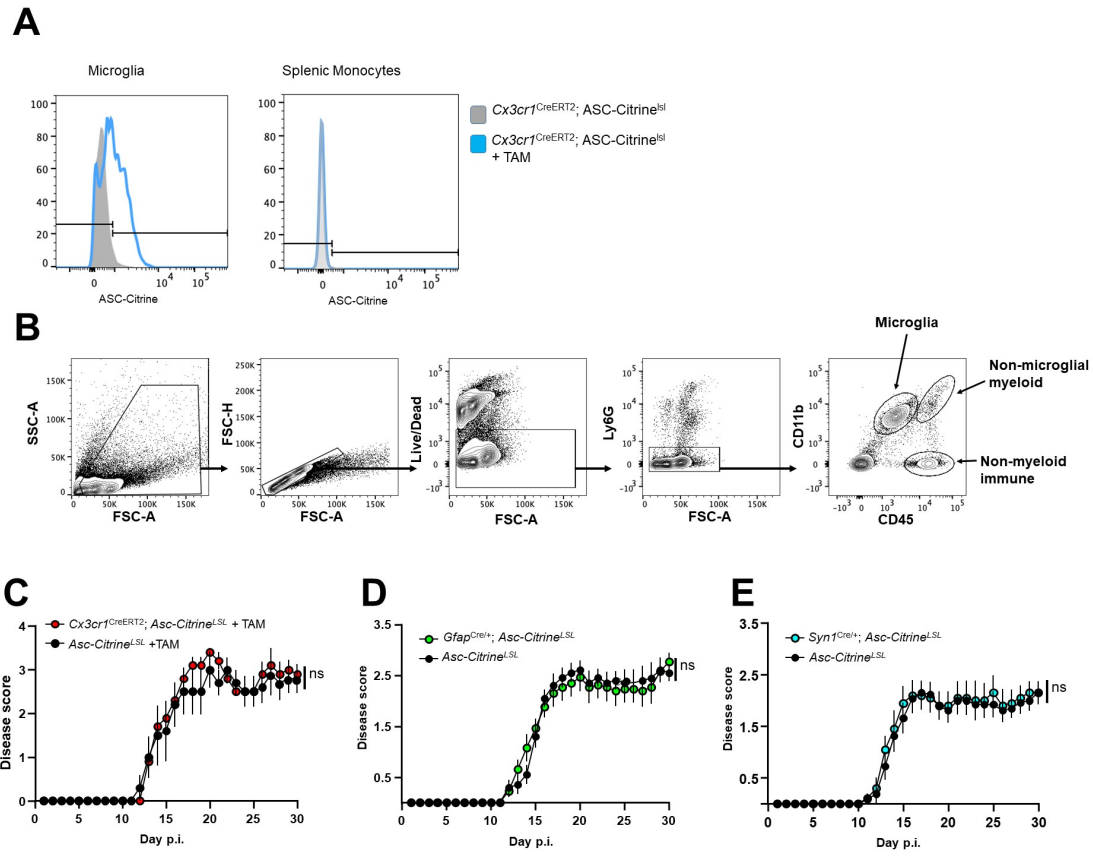

Figure S3

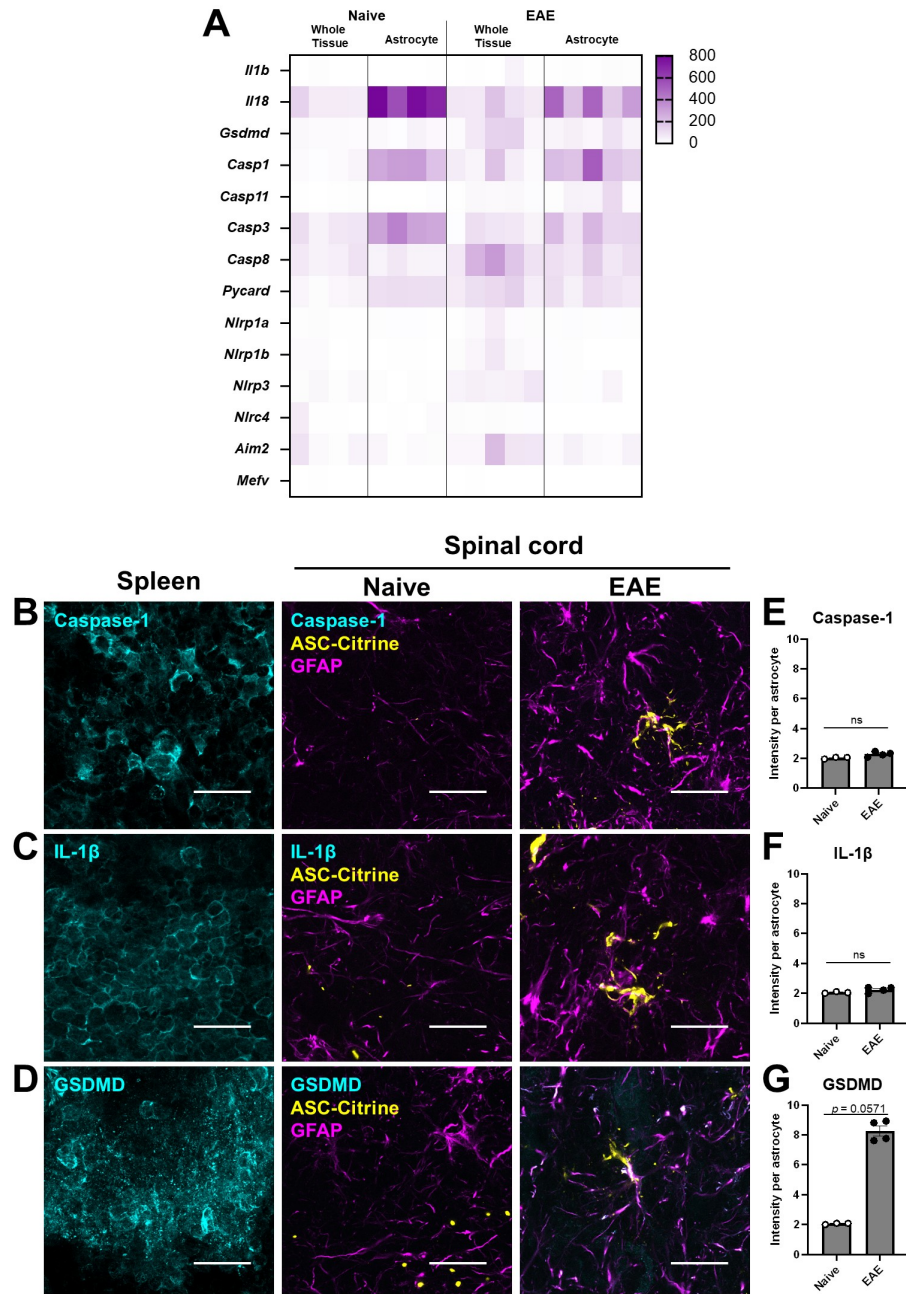

Figure S4

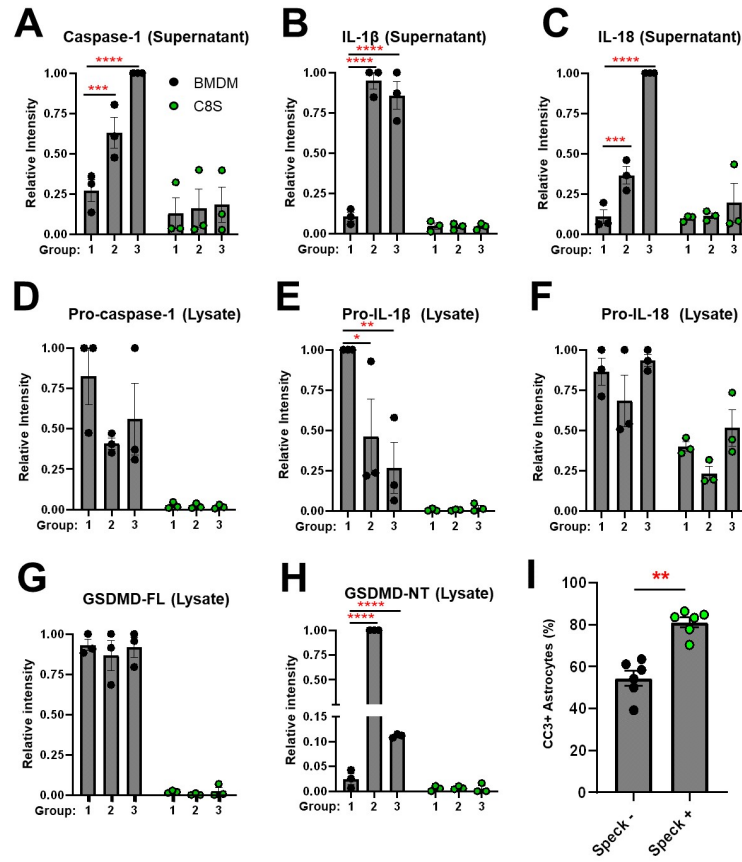

Figure S5

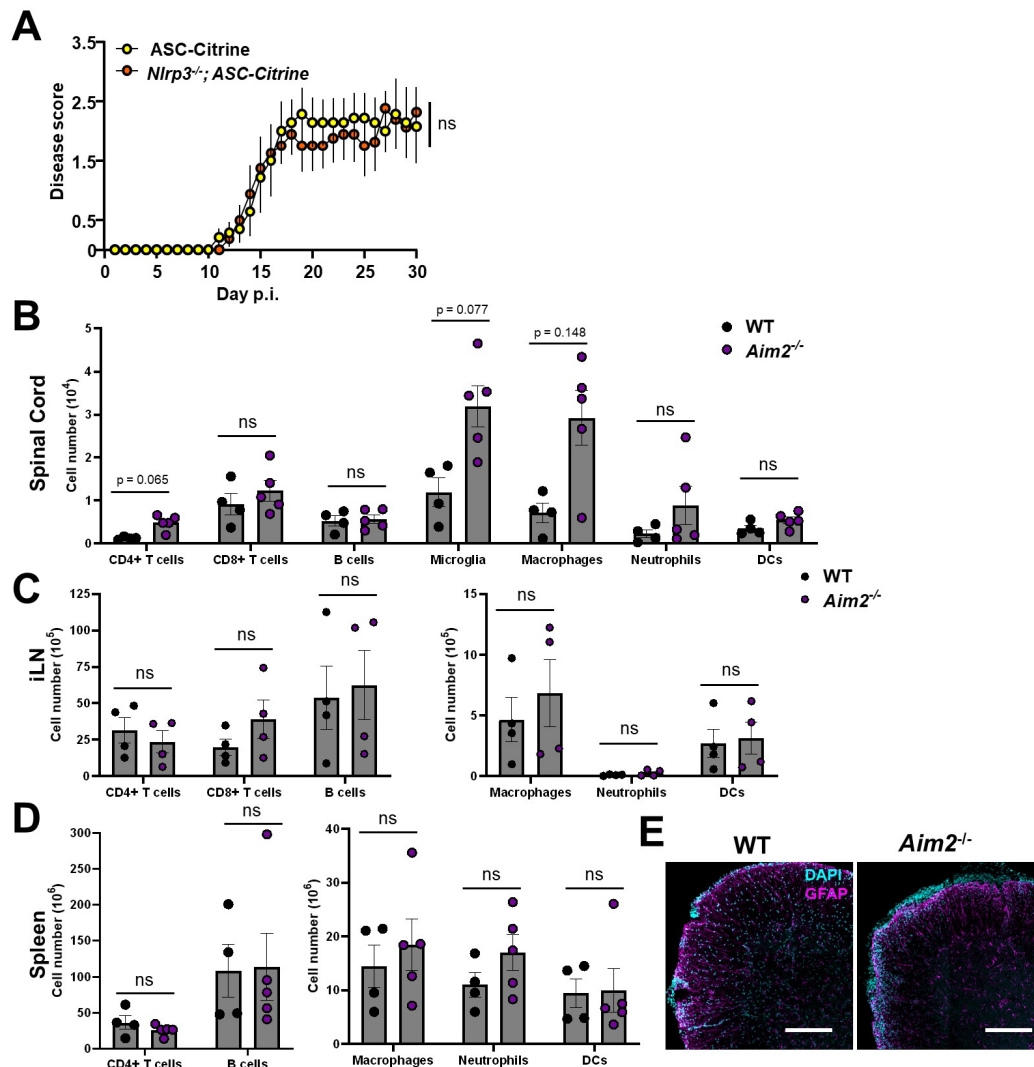

Figure S6

**Table S1. Reagent information for antibody-based techniques**

| Target            | Cat #            | Species | Clone             | Supplier                    | Dilution | Technique                    |
|-------------------|------------------|---------|-------------------|-----------------------------|----------|------------------------------|
| ASC               | AG-25B-0006-C100 | Rabbit  | AL177, polyclonal | Adipogen                    | 1:500    | IF Imaging                   |
| Tmem119           | ab209064         | Rabbit  | 28-3              | Abcam                       | 1:500    | IF Imaging                   |
| GFAP              | 13-0300          | Rat     | 2.2B10            | Invitrogen                  | 1:500    | IF Imaging, Western Blotting |
| ALDHL1            | ab87117          | Rabbit  | polyclonal        | Abcam                       | 1:500    | IF Imaging                   |
| NeuN              | ab104225         | Rabbit  | polyclonal        | Abcam                       | 1:500    | IF Imaging                   |
| ChAT              | AB144P           | Goat    | polyclonal        | EMD Millipore               | 1:100    | IF Imaging                   |
| NG2               | ab275024         | Rabbit  | EPR23976-145      | Abcam                       | 1:500    | IF Imaging                   |
| MBP               | ab218011         | Rabbit  | EPR21188          | Abcam                       | 1:500    | IF Imaging                   |
| Iba1              | NB100-1028       | Goat    | polyclonal        | Novus Biologicals           | 1:500    | IF Imaging                   |
| C3d               | AF2655           | Goat    | polyclonal        | R&D Systems                 | 1:500    | IF Imaging                   |
| Cleaved caspase-3 | 9664S            | Rabbit  | 5AIE              | Cell Signaling Technologies | 1:500    | IF Imaging                   |
| Caspase-1         | N/A              | Rat     | 4b4               | Genentech                   | 1:500    | IF Imaging, Western Blotting |
| Gasdermin D       | PA5-1155330      | Rabbit  | polyclonal        | ThermoFisher Scientific     | 1:500    | IF Imaging                   |
| Gasdermin D       | ab209845         | Rabbit  | EPR19828          | Abcam                       | 1:500    | Western Blotting             |
| IL-1 $\beta$      | AF-401-NA        | Goat    | polyclonal        | R&D Systems                 | 1:1000   | IF Imaging, Western Blotting |
| IL-18             | 210-401-323      | Rabbit  | polyclonal        | Rockland                    | 1:1000   | Western Blotting             |
| CD45.1            | 110708           | Mouse   | A20               | Biolegend                   | 1:200    | Flow Cytometry               |
| CD45.2            | 109831           | Mouse   | 104               | Biolegend                   | 1:200    | Flow Cytometry               |

**Table S2. Sequences of primers used for RT-qPCR assays**

| <b>Gene</b>  | <b>Direction</b> | <b>Sequence</b>                        |
|--------------|------------------|----------------------------------------|
| <i>Actb</i>  | Forward          | TGT TAC CAA CTG GGA CGA CA             |
|              | Reverse          | CTG GGT CAT CTT TTC ACG GT             |
| <i>Casp1</i> | Forward          | GAA GGC CCA TAT AGA GAA AGA TTT TAT TG |
|              | Reverse          | GAC AGG ATG TCT CCA AGA CAC ATT        |
| <i>Gsdmd</i> | Forward          | GCG ATC TCA TTC CGG TGG ACA G          |
|              | Reverse          | TTC CCA TCG ACG ACA TCA GAG AC         |
| <i>Il1b</i>  | Forward          | CGC AGC AGC ACA TCA ACA AGA GC         |
|              | Reverse          | TGT CCT CAT CCT GGA AGG TCC ACG        |
| <i>Il18</i>  | Forward          | CAG GCC TGA CAT CTT CTG CAA            |
|              | Reverse          | CTG ACA TGG CAG CCA TTG T              |
